# Supplementary material for: Penaloidines A and B: two unprecedented pyridine alkaloids from Penicillium sp. KYJ-6
Source: Royal Society of Chemistry journal article supplement (doi:10.1039/d1qo01879e), 2022-01-01
Supplement: d1qo01879e1.pdf [file d1qo01879e1.pdf]

## Supplementary Information

### **Penaloidines A and B: two unprecedented pyridine alkaloids from *Penicillium* sp. KYJ-6**

**Dong Gan, Li Zhu, Xiao-Ran Zhang, Chen-Zhe Li, Cheng-Yao Wang, Le Cai\*, Zhong-Tao Ding\***

Functional Molecules Analysis and Biotransformation Key Laboratory of Universities  
in Yunnan Province, Key Laboratory of Medicinal Chemistry for Natural Resource,  
Ministry of Education, School of Chemical Science and Technology, Yunnan University,  
Kunming 650091, People's Republic of China;

\*Corresponding Authors.

E-mail: ztding@ynu.edu.cn (Zhong-Tao Ding)

E-mail: caile@ynu.edu.cn (Le Cai)

## Content

|                                                                                                                                                         |    |
|---------------------------------------------------------------------------------------------------------------------------------------------------------|----|
| <b>Table S1.</b> Crystal data and structure refinement for Penaloidine A ( <b>1</b> ).....                                                              | 4  |
| <b>Figure S1.</b> <sup>1</sup> H NMR spectrum of penaloidine A ( <b>1</b> ) in methanol- <i>d</i> <sub>4</sub> (400 MHz).....                           | 5  |
| <b>Figure S2.</b> <sup>13</sup> C and DEPT NMR spectrum of penaloidine A ( <b>1</b> ) in methanol- <i>d</i> <sub>4</sub> (100 MHz)..                    | 5  |
| <b>Figure S3.</b> HSQC spectrum of penaloidine A ( <b>1</b> ) in methanol- <i>d</i> <sub>4</sub> (400 MHz). ....                                        | 6  |
| <b>Figure S4.</b> <sup>1</sup> H- <sup>1</sup> H COSY spectrum of penaloidine A ( <b>1</b> ) in methanol- <i>d</i> <sub>4</sub> (400 MHz).....          | 6  |
| <b>Figure S5.</b> HMBC spectrum of penaloidine A ( <b>1</b> ) in methanol- <i>d</i> <sub>4</sub> (400 MHz). ....                                        | 7  |
| <b>Figure S6.</b> NOESY spectrum of penaloidine A ( <b>1</b> ) in methanol- <i>d</i> <sub>4</sub> (400 MHz).....                                        | 7  |
| <b>Figure S7.</b> HRESIMS spectrum of penaloidine A ( <b>1</b> ).....                                                                                   | 8  |
| <b>Figure S8.</b> UV Spectrum of penaloidine A ( <b>1</b> ) in methanol.....                                                                            | 8  |
| <b>Figure S9.</b> <sup>1</sup> H NMR spectrum of penaloidine A ( <b>1</b> ) in CDCl <sub>3</sub> (400 MHz).....                                         | 9  |
| <b>Figure S10.</b> <sup>13</sup> C NMR spectrum of penaloidine A ( <b>1</b> ) in CDCl <sub>3</sub> (400 MHz).....                                       | 9  |
| <b>Figure S11.</b> HSQC spectrum of penaloidine A ( <b>1</b> ) in CDCl <sub>3</sub> (400 MHz). ....                                                     | 10 |
| <b>Figure S12.</b> HMBC spectrum of penaloidine A ( <b>1</b> ) in CDCl <sub>3</sub> (400 MHz). ....                                                     | 10 |
| <b>Figure S13.</b> NOESY spectrum of penaloidine A ( <b>1</b> ) in CDCl <sub>3</sub> (400 MHz).....                                                     | 11 |
| <b>Table S2</b> <sup>1</sup> H NMR (400MHz) and <sup>13</sup> C NMR (100MHz) spectroscopic data in CDCl <sub>3</sub> of penaloidine A ( <b>1</b> )..... | 11 |
| <b>Figure S14.</b> IR spectrum of penaloidine A ( <b>1</b> ) .....                                                                                      | 12 |
| <b>Figure S15.</b> <sup>1</sup> H NMR spectrum of penaloidine B ( <b>2</b> ) in methanol- <i>d</i> <sub>4</sub> (400 MHz). ....                         | 12 |
| <b>Figure S16.</b> <sup>13</sup> C and DEPT NMR spectrum of penaloidine B ( <b>2</b> ) in methanol- <i>d</i> <sub>4</sub> (100 MHz).<br>.....           | 13 |
| <b>Figure S17.</b> HSQC spectrum of penaloidine B ( <b>2</b> ) in methanol- <i>d</i> <sub>4</sub> (400 MHz).....                                        | 13 |
| <b>Figure S18.</b> <sup>1</sup> H- <sup>1</sup> H COSY spectrum of penaloidine B ( <b>2</b> ) in methanol- <i>d</i> <sub>4</sub> (400 MHz) .....        | 14 |
| <b>Figure S19.</b> HMBC spectrum of penaloidine B ( <b>2</b> ) in methanol- <i>d</i> <sub>4</sub> (400 MHz).....                                        | 14 |
| <b>Figure S20.</b> NOESY spectrum of penaloidine B ( <b>2</b> ) in methanol- <i>d</i> <sub>4</sub> (400 MHz). ....                                      | 15 |
| <b>Figure S21.</b> HRESIMS spectrum of penaloidine B ( <b>2</b> ). ....                                                                                 | 15 |
| <b>Figure S22.</b> UV Spectrum of penaloidine B ( <b>2</b> ) in methanol.....                                                                           | 16 |
| <b>Figure S23.</b> <sup>1</sup> H NMR spectrum of penaloidine B ( <b>2</b> ) in CDCl <sub>3</sub> (400 MHz).....                                        | 16 |
| <b>Figure S24.</b> <sup>13</sup> C NMR spectrum of penaloidine B ( <b>2</b> ) in CDCl <sub>3</sub> (400 MHz). ....                                      | 17 |
| <b>Figure S25.</b> HSQC spectrum of penaloidine B ( <b>2</b> ) in CDCl <sub>3</sub> (400 MHz).....                                                      | 17 |
| <b>Figure S26.</b> HMBC spectrum of penaloidine B ( <b>2</b> ) in CDCl <sub>3</sub> (400 MHz).....                                                      | 18 |
| <b>Figure S27.</b> NOESY spectrum of penaloidine B ( <b>2</b> ) in CDCl <sub>3</sub> (400 MHz).....                                                     | 18 |

|                                                                                                                                                                                                                                                    |    |
|----------------------------------------------------------------------------------------------------------------------------------------------------------------------------------------------------------------------------------------------------|----|
| <b>Table S3</b> <sup>1</sup> H NMR (400MHz) and <sup>13</sup> C NMR (100MHz) spectroscopic data in CDCl <sub>3</sub> of penaloidine B ( <b>2</b> ).                                                                                                | 19 |
| <b>Figure S28.</b> IR spectrum of penaloidine B ( <b>2</b> ).                                                                                                                                                                                      | 19 |
| <b>NMR Computational Methods</b>                                                                                                                                                                                                                   | 19 |
| <b>Table S4.</b> Energy (298.15K) analysis for a (5R,7R,8S)-1, b (5S,7R,8S)-1, c (5R,7S,8S)-1 and d (5S,7S,8R)-1                                                                                                                                   | 19 |
| <b>Figure S29.</b> Mpw1pw91/6-311+G(d,p) (chloroform) optimized lowest energy conformers for 1(a-d).                                                                                                                                               | 20 |
| <b>Figure S30.</b> DP4+ evaluation of theoretical and experimental data of penaloidine A ( <b>1</b> ).                                                                                                                                             | 20 |
| <b>Table S5.</b> Calculated (calc.) and experimental (exp.) <sup>1</sup> H NMR chemical shift values of <b>a-d</b> of <b>1</b> at the mPW1PW91/6-311+G(d,p) level in chloroform and total absolute deviation (TAD) and mean absolute error (MAE).  | 21 |
| <b>Table S6.</b> Energy (298.15K) analysis for a (5R,7S,8S)-2, b (5S,7S,8S)-2, c (5S,7R,8R)-2 and d (5R,7R,8R)-2                                                                                                                                   | 21 |
| <b>Figure S31.</b> Mpw1pw91/6-311+G(d,p) (chloroform) optimized lowest energy conformers for 2 (a-d).                                                                                                                                              | 22 |
| <b>Figure S32.</b> DP4+ evaluation of theoretical and experimental data of penaloidine B ( <b>2</b> ).                                                                                                                                             | 22 |
| <b>Table S7.</b> Calculated (calc.) and experimental (exp.) <sup>13</sup> C NMR chemical shift values of <b>a-b</b> of <b>2</b> at the mPW1PW91/6-311+G(d,p) level in chloroform and total absolute deviation (TAD) and mean absolute error (MAE). | 23 |
| <b>Table S8.</b> Calculated (calc.) and experimental (exp.) <sup>1</sup> H NMR chemical shift values of <b>a-d</b> of <b>2</b> at the mPW1PW91/6-311+G(d,p) level in chloroform and total absolute deviation (TAD) and mean absolute error (MAE).  | 23 |
| <b>Figure S33.</b> Total absolute deviation (TAD), mean absolute error (MAE), and DP4+ probability analyses for <b>2</b> and its three diastereomers.                                                                                              | 23 |
| <b>Figure S34.</b> Linear correlations between the experimental and calculated <sup>13</sup> CNMR chemical shifts for <b>2</b> and its three diastereomers at the PCM/mPW1PW91/6-311+G(d,p) level.                                                 | 24 |
| <b>ECD calculation details for compounds 1-2</b>                                                                                                                                                                                                   | 24 |
| <b>Figure S35.</b> Optimized geometries of predominant conformers for <b>1</b> .                                                                                                                                                                   | 24 |
| <b>Table S9.</b> Cartesian Coordinates of the Lowest Energy Conformers for Compound <b>1</b> .                                                                                                                                                     | 24 |
| <b>Figure S36.</b> Optimized geometries of predominant conformers for <b>2</b> .                                                                                                                                                                   | 28 |
| <b>Table S10.</b> Cartesian Coordinates of the Lowest Energy Conformers for Compound <b>2</b> .                                                                                                                                                    | 28 |

**Table S1.** Crystal data and structure refinement for Penaloidine A (**1**).

|                                   |                                                                                                                                                   |
|-----------------------------------|---------------------------------------------------------------------------------------------------------------------------------------------------|
| Identification code               | global                                                                                                                                            |
| Empirical formula                 | C13 H16 N2 O3                                                                                                                                     |
| Formula weight                    | 248.28                                                                                                                                            |
| Temperature                       | 100(2) K                                                                                                                                          |
| Wavelength                        | 1.54178 Å                                                                                                                                         |
| Crystal system                    | Orthorhombic                                                                                                                                      |
| Space group                       | P2 <sub>1</sub> 2 <sub>1</sub> 2 <sub>1</sub>                                                                                                     |
| Unit cell dimensions              | a = 9.0646(2) Å                      α = 90°.<br>b = 13.3250(3) Å                      β = 90°.<br>c = 20.6396(4) Å                      γ = 90°. |
| Volume                            | 2492.97(9) Å <sup>3</sup>                                                                                                                         |
| Z                                 | 8                                                                                                                                                 |
| Density (calculated)              | 1.323 Mg/m <sup>3</sup>                                                                                                                           |
| Absorption coefficient            | 0.782 mm <sup>-1</sup>                                                                                                                            |
| F(000)                            | 1056                                                                                                                                              |
| Crystal size                      | 0.650 x 0.530 x 0.470 mm <sup>3</sup>                                                                                                             |
| Theta range for data collection   | 3.95 to 72.12°.                                                                                                                                   |
| Index ranges                      | -11 ≤ h ≤ 11, -15 ≤ k ≤ 16, -25 ≤ l ≤ 24                                                                                                          |
| Reflections collected             | 27321                                                                                                                                             |
| Independent reflections           | 4905 [R(int) = 0.0330]                                                                                                                            |
| Completeness to theta = 72.12°    | 99.6 %                                                                                                                                            |
| Absorption correction             | Semi-empirical from equivalents                                                                                                                   |
| Max. and min. transmission        | 0.71 and 0.58                                                                                                                                     |
| Refinement method                 | Full-matrix least-squares on F <sup>2</sup>                                                                                                       |
| Data / restraints / parameters    | 4905 / 0 / 332                                                                                                                                    |
| Goodness-of-fit on F <sup>2</sup> | 1.068                                                                                                                                             |
| Final R indices [I > 2σ(I)]       | R1 = 0.0262, wR2 = 0.0680                                                                                                                         |
| R indices (all data)              | R1 = 0.0263, wR2 = 0.0681                                                                                                                         |
| Absolute structure parameter      | 0.01(3)                                                                                                                                           |
| Extinction coefficient            | 0.0153(6)                                                                                                                                         |
| Largest diff. peak and hole       | 0.224 and -0.239 e.Å <sup>-3</sup>                                                                                                                |

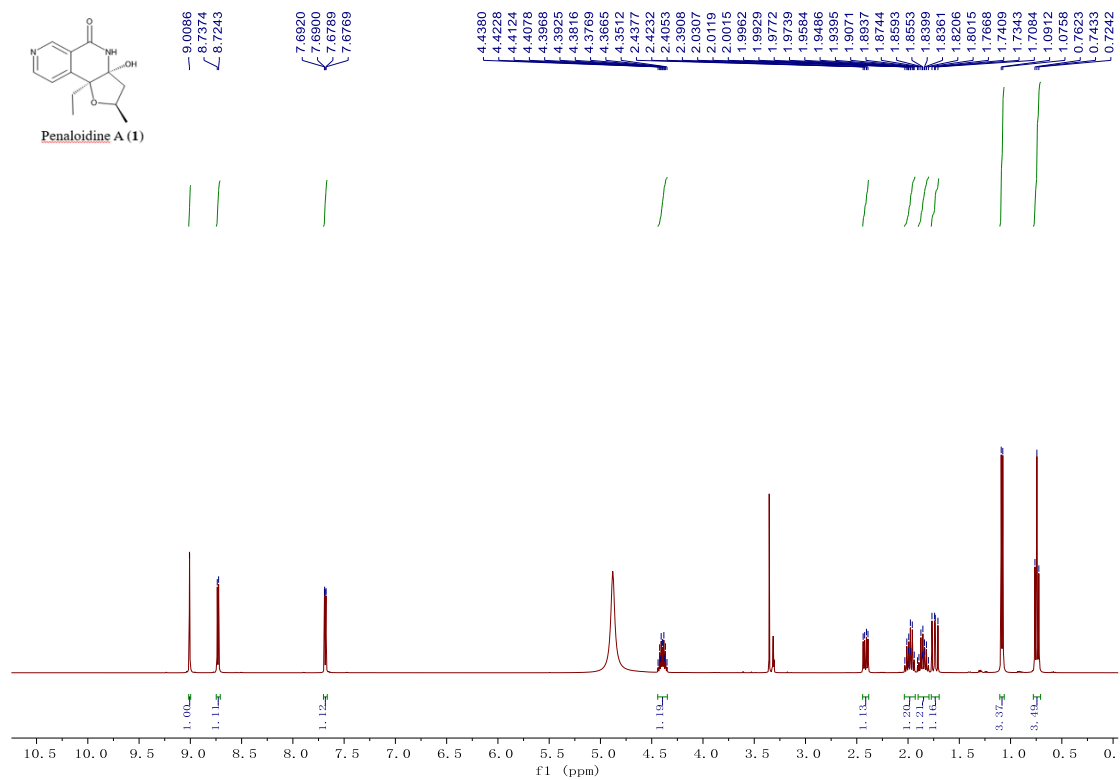

**Figure S1.** <sup>1</sup>H NMR spectrum of penaloidine A (1) in methanol-*d*<sub>4</sub> (400 MHz).

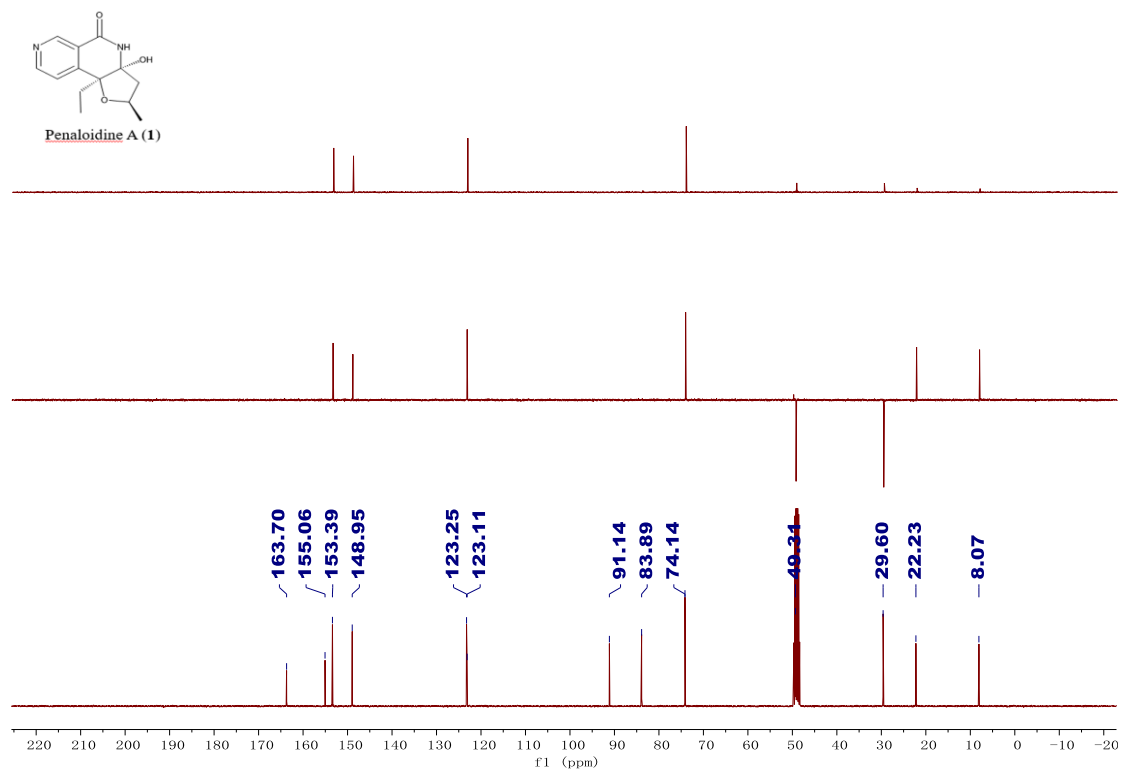

**Figure S2.** <sup>13</sup>C and DEPT NMR spectrum of penaloidine A (1) in methanol-*d*<sub>4</sub> (100 MHz).

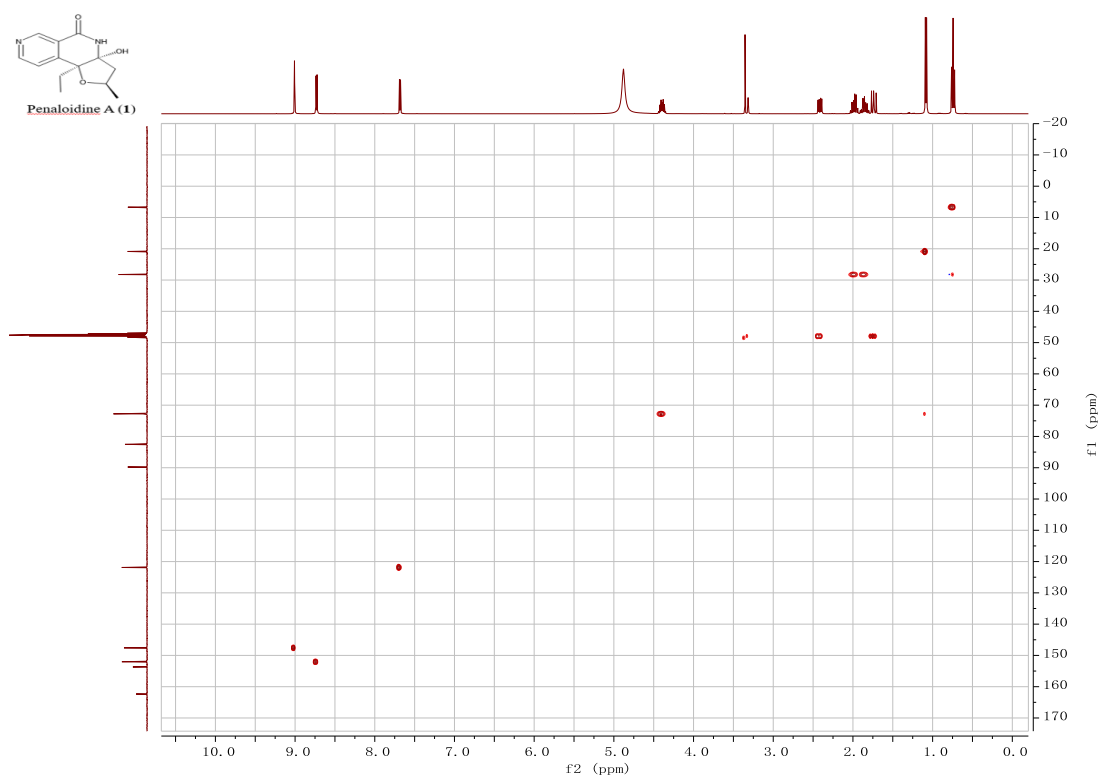

**Figure S3.** HSQC spectrum of penaloidine A (**1**) in methanol- $d_4$  (400 MHz).

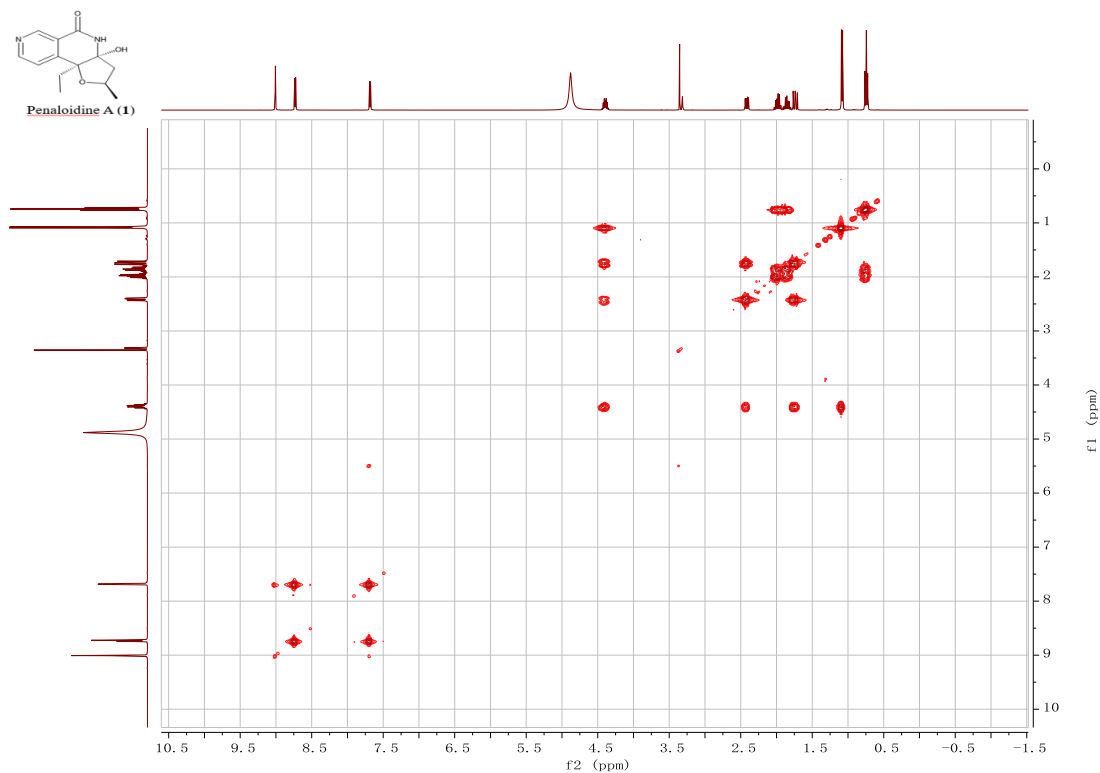

**Figure S4.**  $^1\text{H}$ - $^1\text{H}$  COSY spectrum of penaloidine A (**1**) in methanol- $d_4$  (400 MHz).

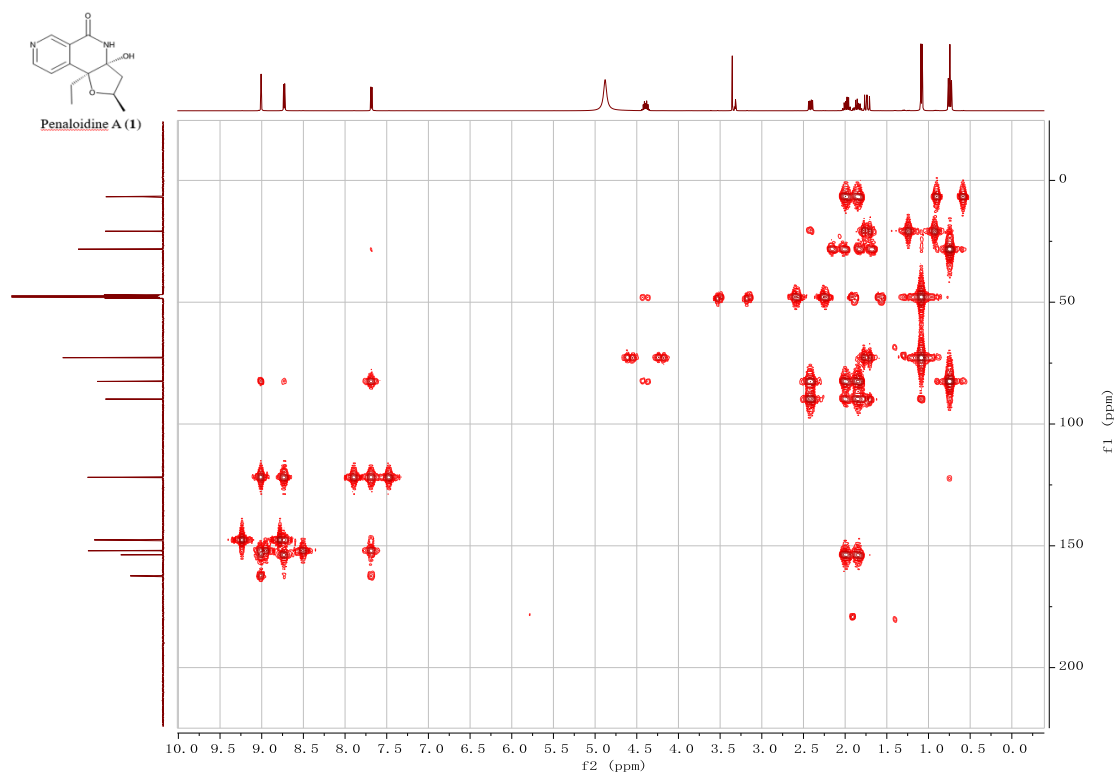

**Figure S5.** HMBC spectrum of penaloidine A (1) in methanol-*d*<sub>4</sub> (400 MHz).

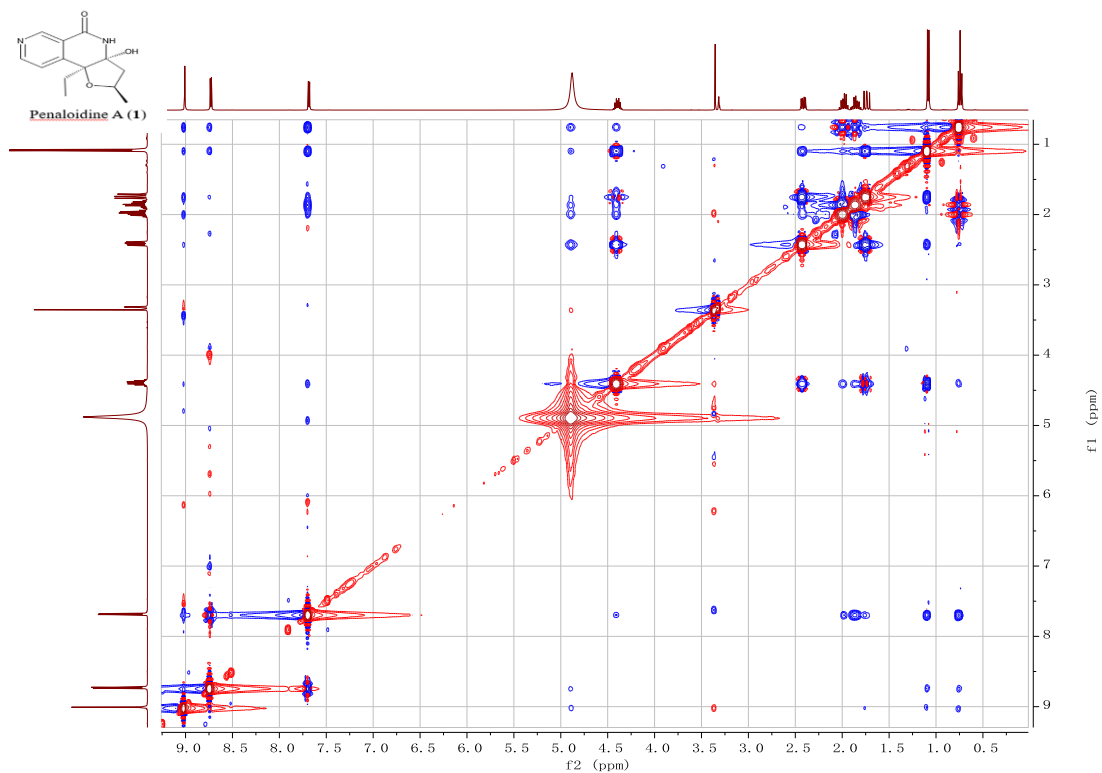

**Figure S6.** NOESY spectrum of penaloidine A (1) in methanol-*d*<sub>4</sub> (400 MHz).

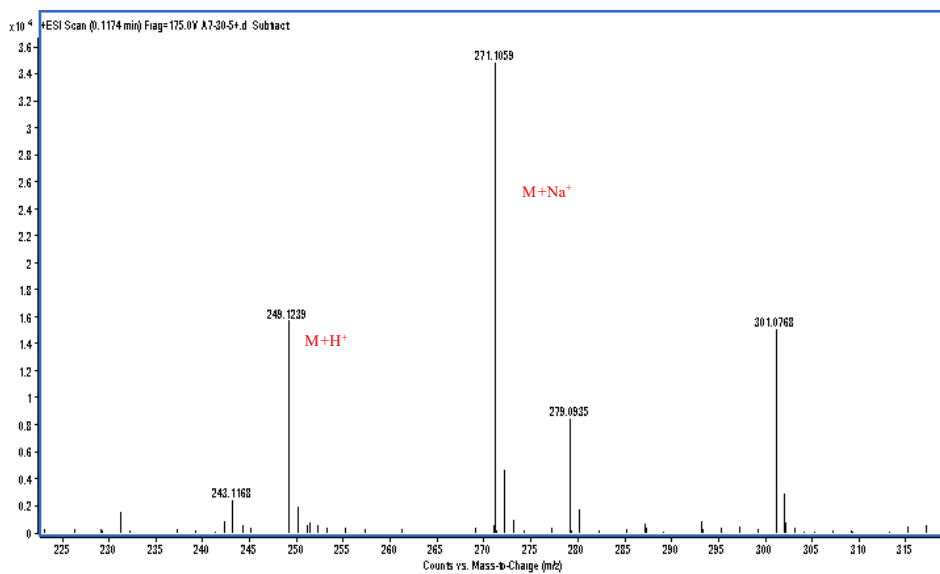

MS Formula Results: + Scan (0.1174 min) Sub (A7-30-5+.d)

| m/z                                 | Ion                                                           | Formula                                                         | Abundance |             |           |             |            |             |               |
|-------------------------------------|---------------------------------------------------------------|-----------------------------------------------------------------|-----------|-------------|-----------|-------------|------------|-------------|---------------|
| 249.1239                            | (M+H) <sup>+</sup>                                            | C <sub>13</sub> H <sub>17</sub> N <sub>2</sub> O <sub>3</sub>   | 15727.1   |             |           |             |            |             |               |
| Best                                | Formula (M)                                                   | Ion Formula                                                     | Score     | Cross Score | Calc. m/z | Diff. (ppm) | Mass Match | Abund Match | Spacing Match |
| <input checked="" type="checkbox"/> | C <sub>13</sub> H <sub>16</sub> N <sub>2</sub> O <sub>3</sub> | C <sub>13</sub> H <sub>17</sub> N <sub>2</sub> O <sub>3</sub>   | 91.91     |             | 249.1234  | -2.23       | 97.39      | 87.01       | 86.83         |
| m/z                                 | Ion                                                           | Formula                                                         | Abundance |             |           |             |            |             |               |
| 271.1059                            | (M+Na) <sup>+</sup>                                           | C <sub>13</sub> H <sub>16</sub> N <sub>2</sub> NaO <sub>3</sub> | 34895.6   |             |           |             |            |             |               |
| Best                                | Formula (M)                                                   | Ion Formula                                                     | Score     | Cross Score | Calc. m/z | Diff. (ppm) | Mass Match | Abund Match | Spacing Match |
| <input checked="" type="checkbox"/> | C <sub>13</sub> H <sub>16</sub> N <sub>2</sub> O <sub>3</sub> | C <sub>13</sub> H <sub>16</sub> N <sub>2</sub> NaO <sub>3</sub> | 81.68     |             | 271.1053  | -2.25       | 97.53      | 82.93       | 48.47         |

Figure S7. HRMSIMS spectrum of penaloidine A (1).

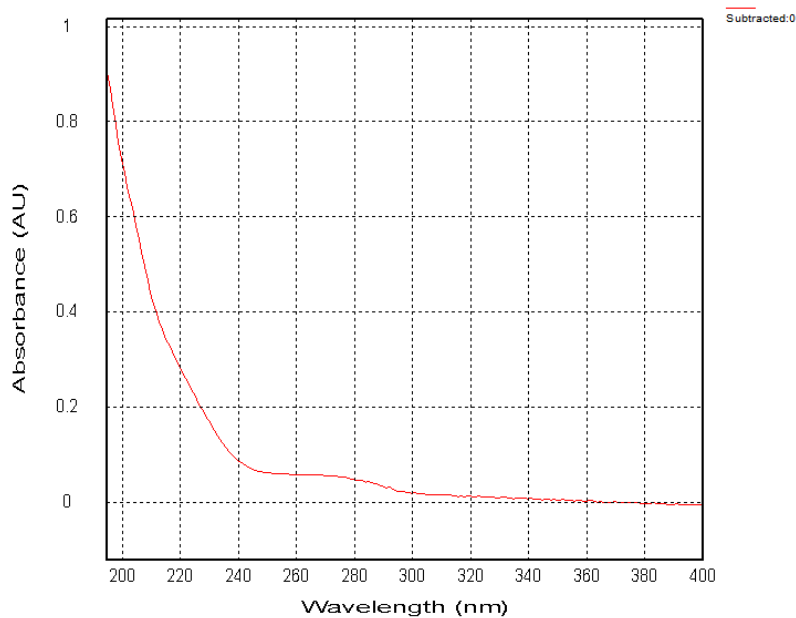

Figure S8. UV Spectrum of penaloidine A (1) in methanol



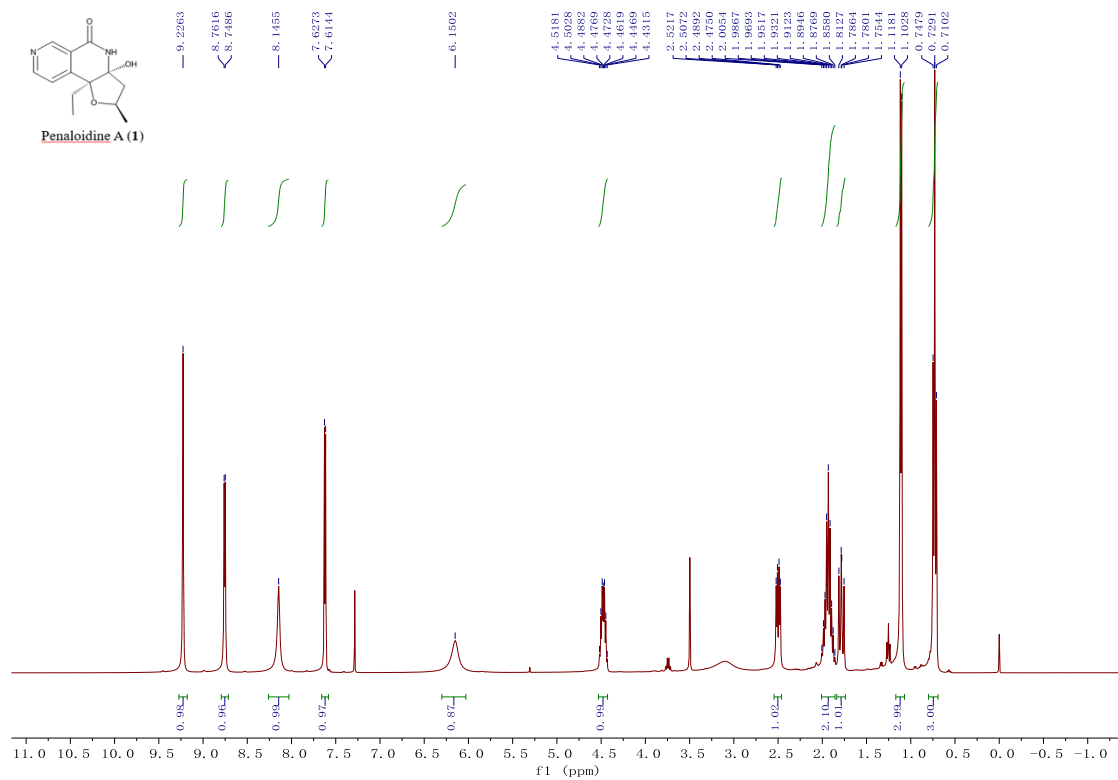

**Figure S9.**  $^1\text{H}$  NMR spectrum of penaloidine A (1) in  $\text{CDCl}_3$  (400 MHz).

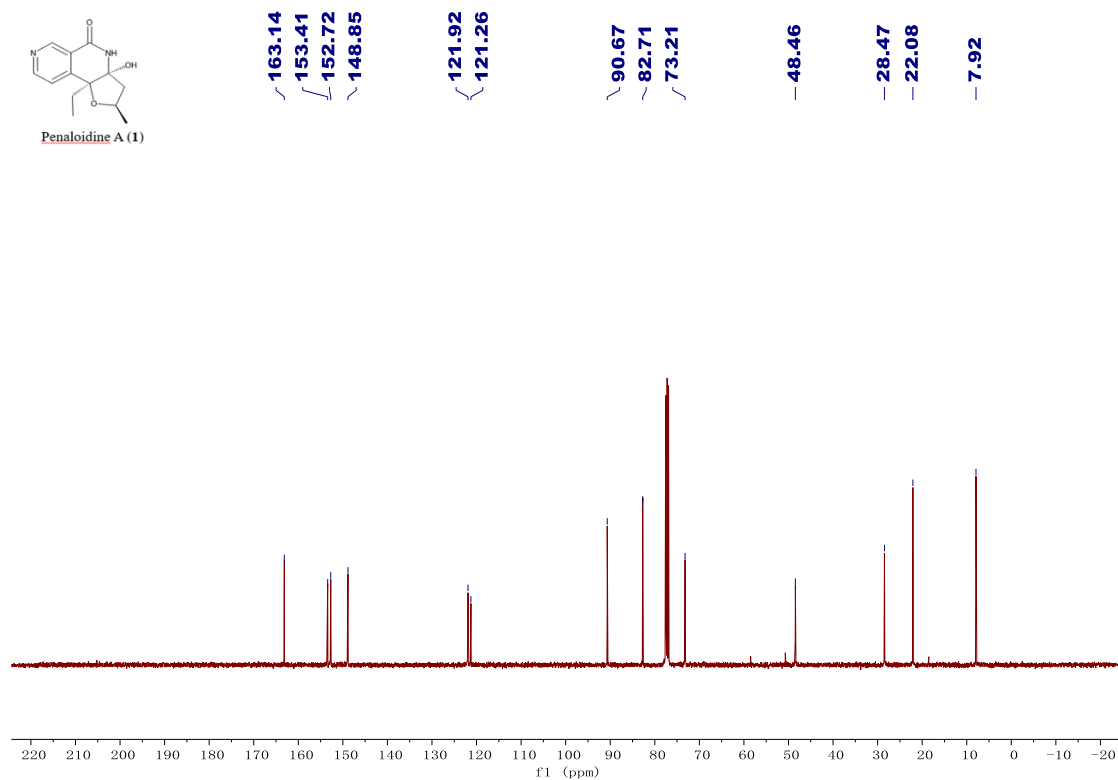

**Figure S10.**  $^{13}\text{C}$  NMR spectrum of penaloidine A (1) in  $\text{CDCl}_3$  (400 MHz).

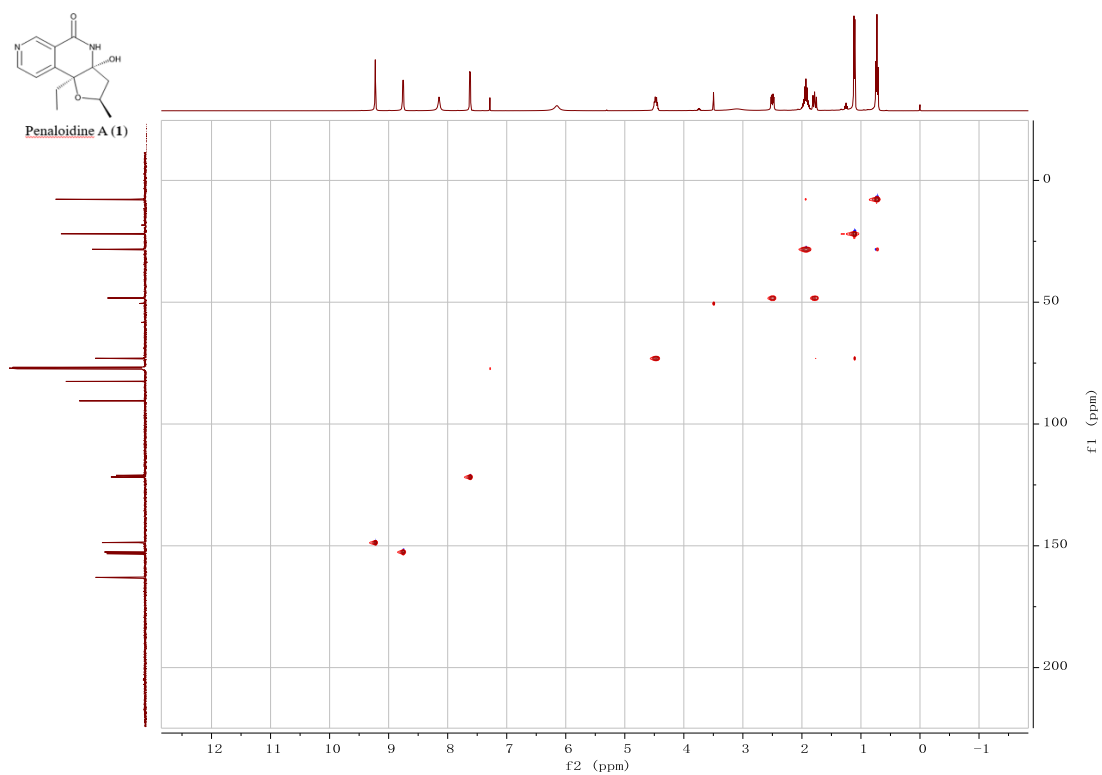

**Figure S11.** HSQC spectrum of penaloidine A (1) in CDCl<sub>3</sub> (400 MHz).

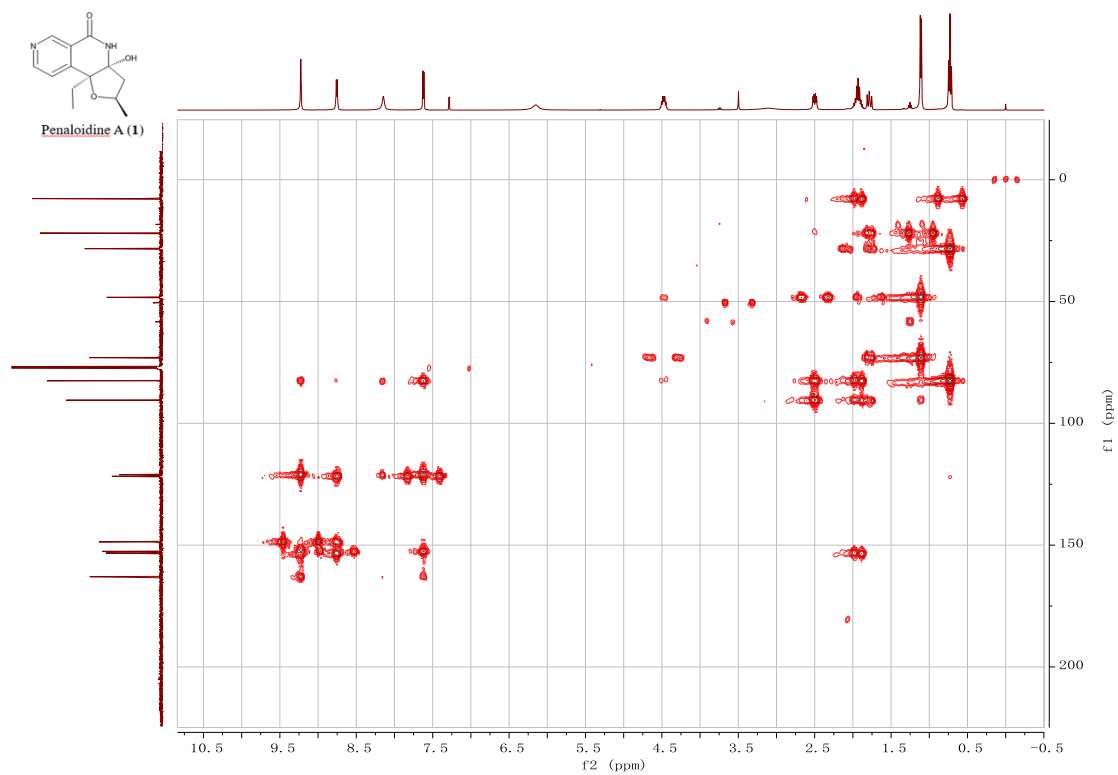

**Figure S12.** HMBC spectrum of penaloidine A (1) in CDCl<sub>3</sub> (400 MHz).

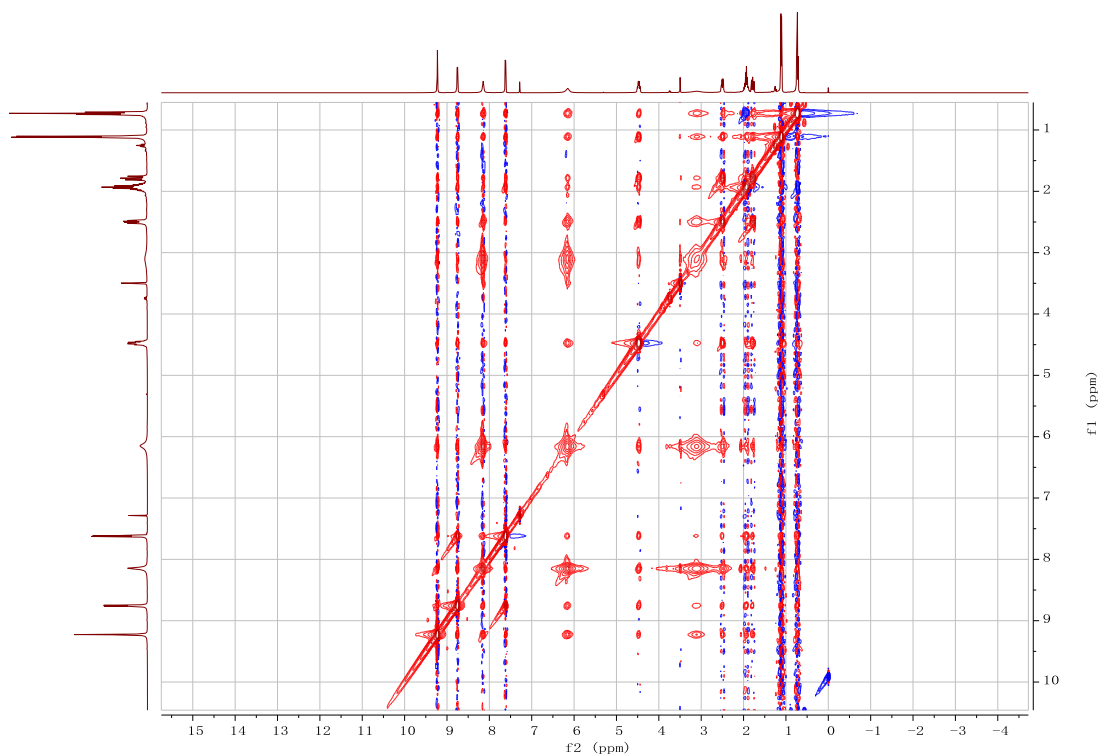

**Figure S13.** NOESY spectrum of penaloidine A (**1**) in  $\text{CDCl}_3$  (400 MHz).

**Table S2**  $^1\text{H}$  NMR (400MHz) and  $^{13}\text{C}$  NMR (100MHz) spectroscopic data in  $\text{CDCl}_3$  of penaloidine A (**1**).

| Pos. | <b>1</b> (in $\text{CDCl}_3$ )   |                     |
|------|----------------------------------|---------------------|
|      | $\delta_{\text{H}}$ ( $J$ in Hz) | $\delta_{\text{C}}$ |
| 1    | 8.75, d (5.1)                    | 152.7, CH           |
| 2    | 9.2, brs                         | 148.9, CH           |
| 3    |                                  | 121.3, C            |
| 4    |                                  | 163.1, C            |
| 5    |                                  | 90.7, C             |
| 6a   | 1.78, dd (10.5,13.0)             | 48.5, $\text{CH}_2$ |
| 6b   | 2.49, dd (5.8, 13.0)             |                     |
| 7    | 4.47, m                          | 73.2, CH            |
| 8    |                                  | 82.7, C             |
| 9    |                                  | 153.4, C            |
| 10   | 7.68, brd (5.1)                  | 121.9, CH           |
| 11   | 1.93, m                          | 28.5, $\text{CH}_2$ |
| 12   | 0.72, t (7.5)                    | 7.9, $\text{CH}_3$  |
| 13   | 1.10, d (6.1)                    | 22.1, $\text{CH}_3$ |
| -NH- | 8.75, s                          |                     |
| OH-5 | 6.15, s                          |                     |

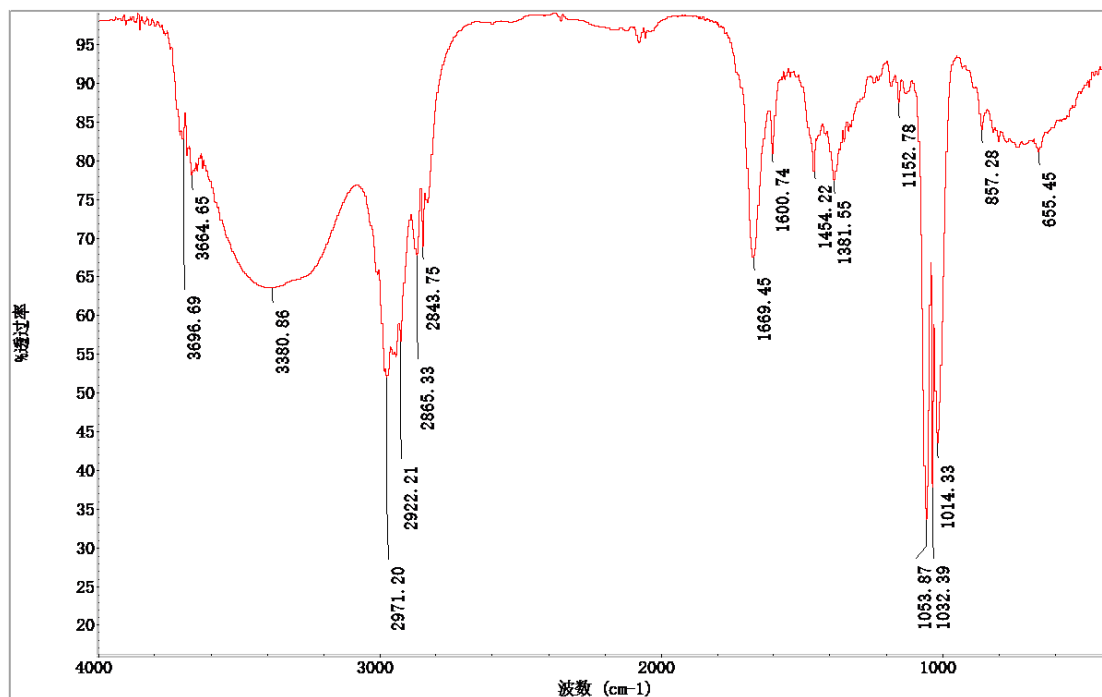

Figure S14. IR spectrum of penaloidine A (1)

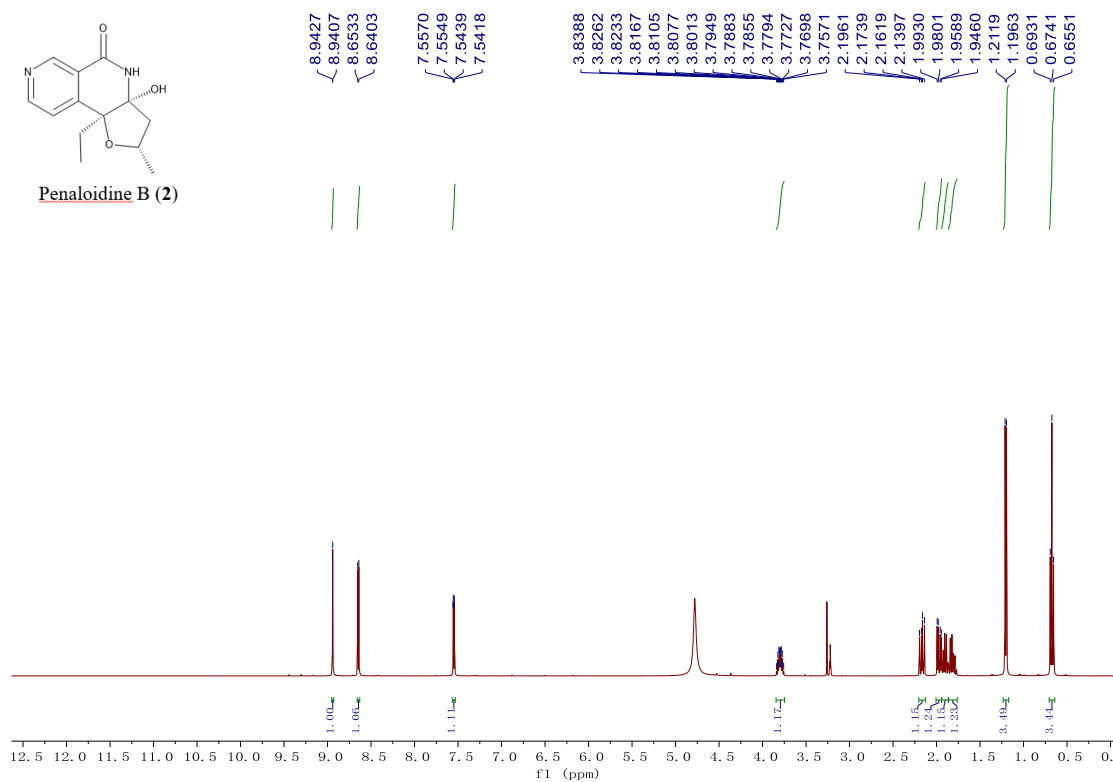

Figure S15.  $^1\text{H}$  NMR spectrum of penaloidine B (2) in methanol- $d_4$  (400 MHz).

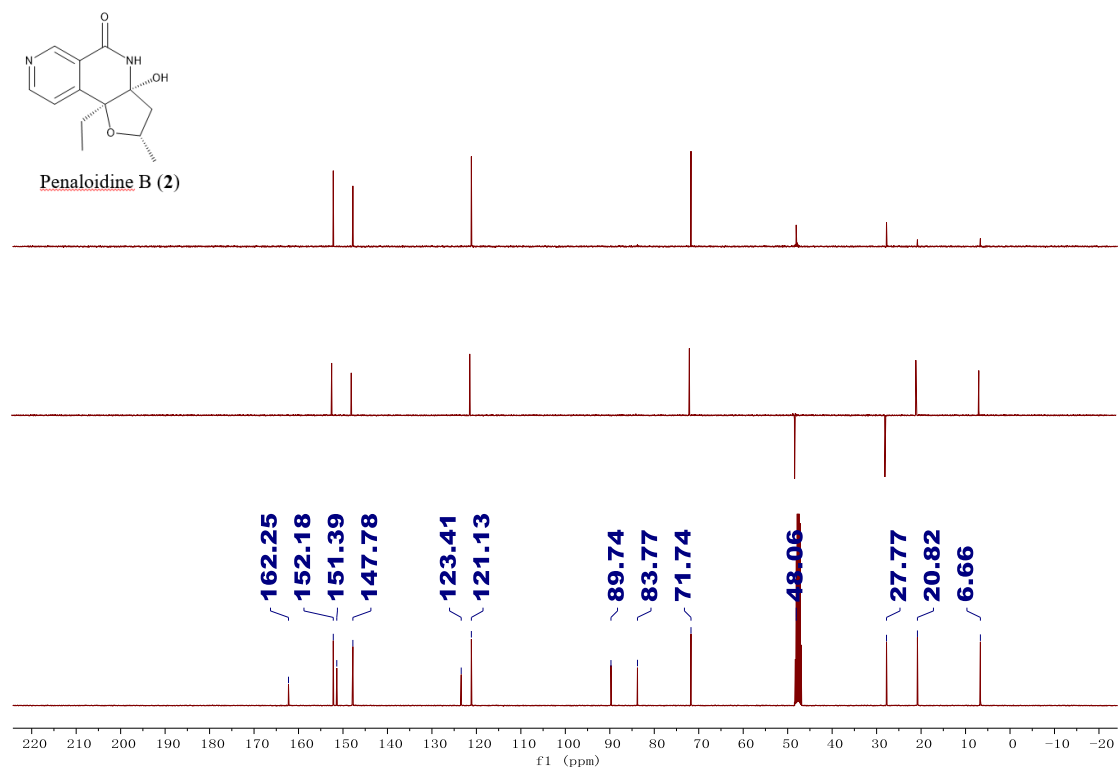

**Figure S16.**  $^{13}\text{C}$  and DEPT NMR spectrum of penaloidine B (2) in methanol- $d_4$  (100 MHz).

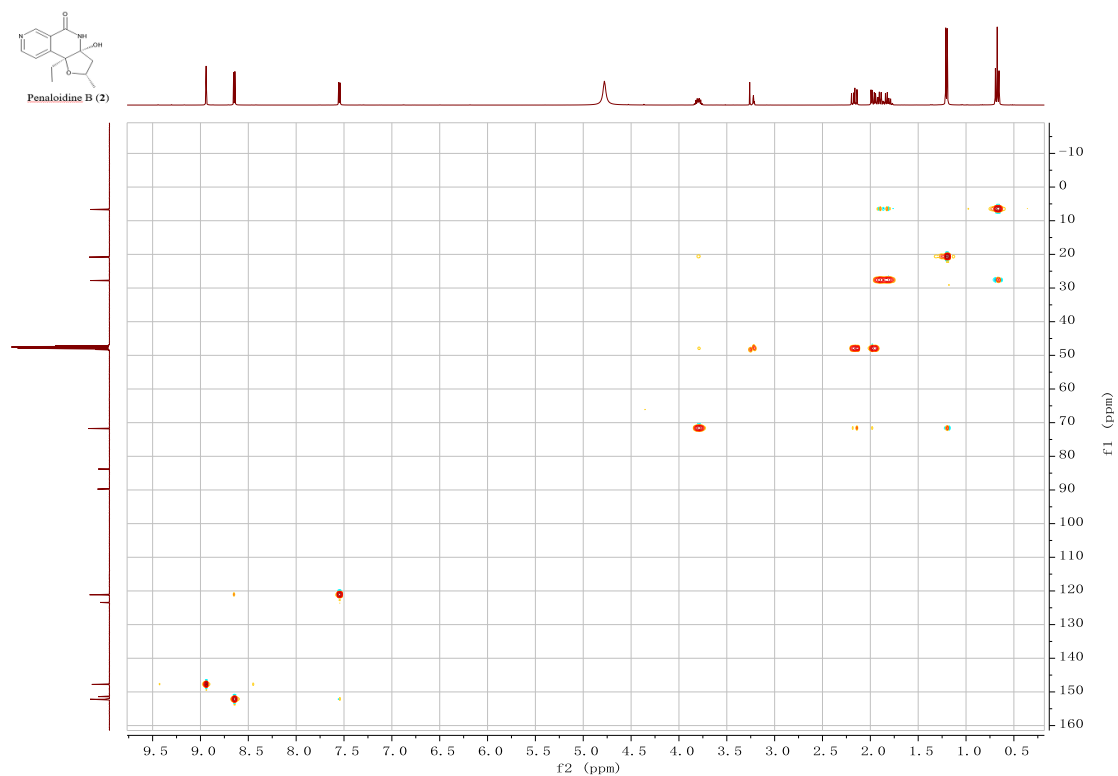

**Figure S17.** HSQC NMR spectrum of penaloidine B (2) in methanol- $d_4$  (400 MHz).

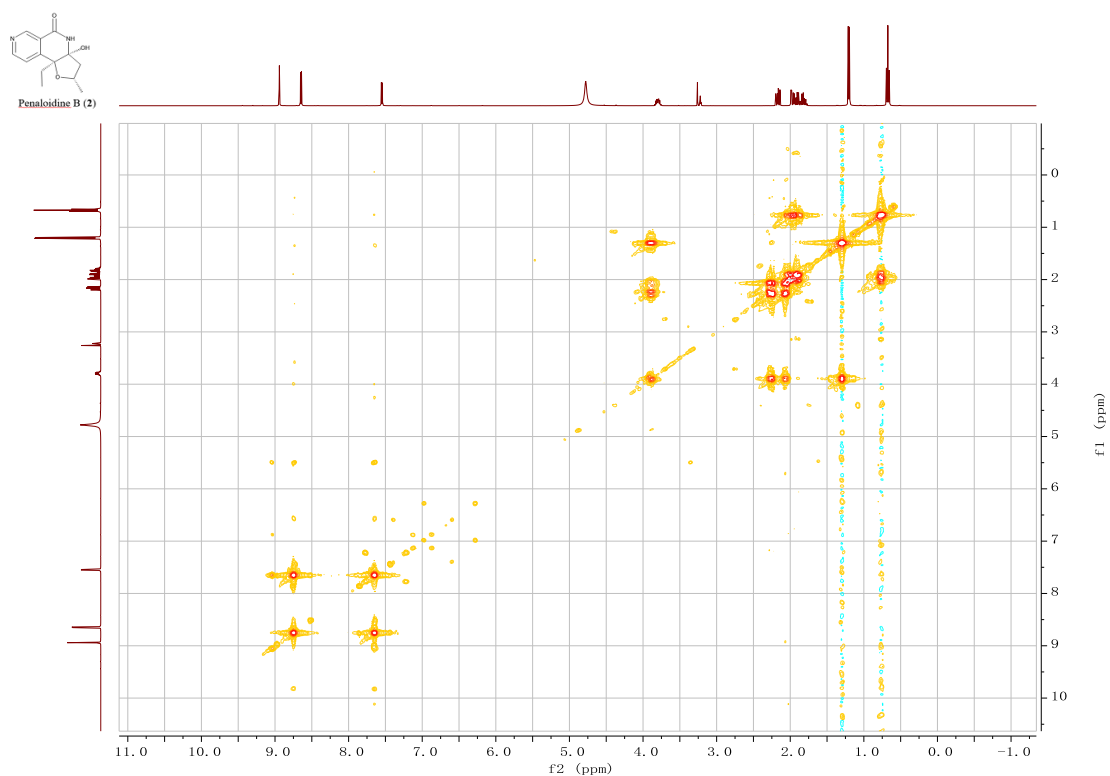

**Figure S18.**  $^1\text{H}$ - $^1\text{H}$  COSY spectrum of penaloidine B (2) in methanol- $d_4$  (400 MHz)

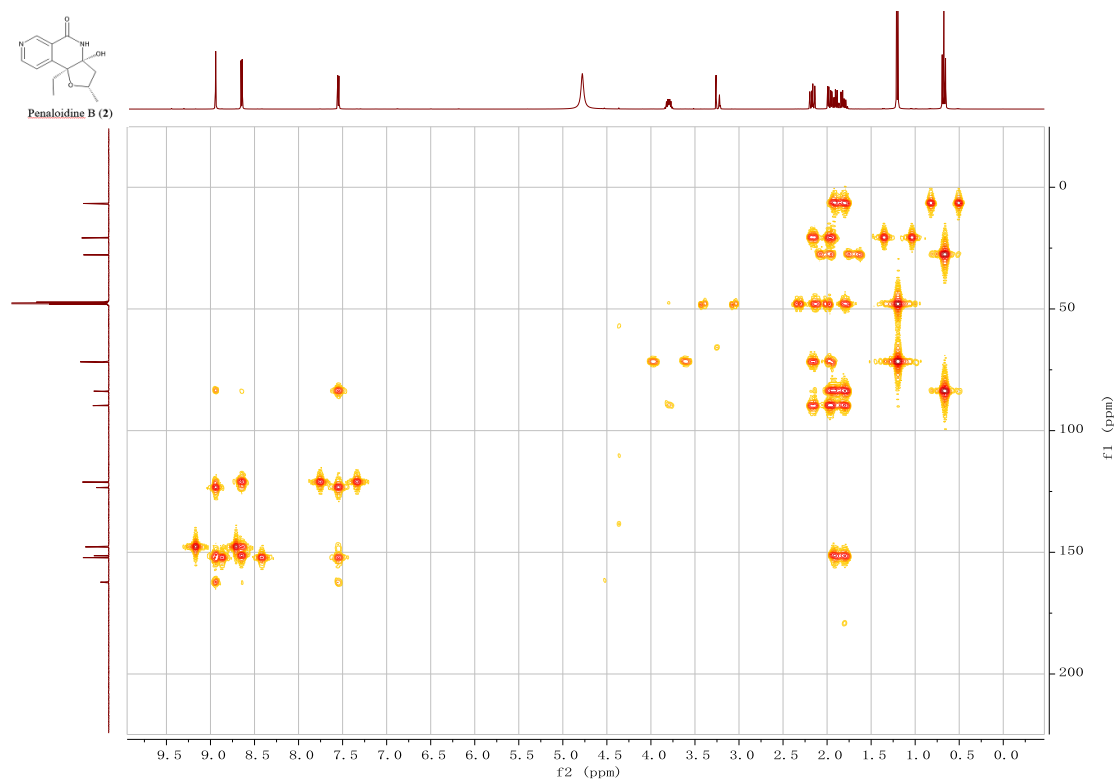

**Figure S19.** HMBC spectrum of penaloidine B (2) in methanol- $d_4$  (400 MHz).

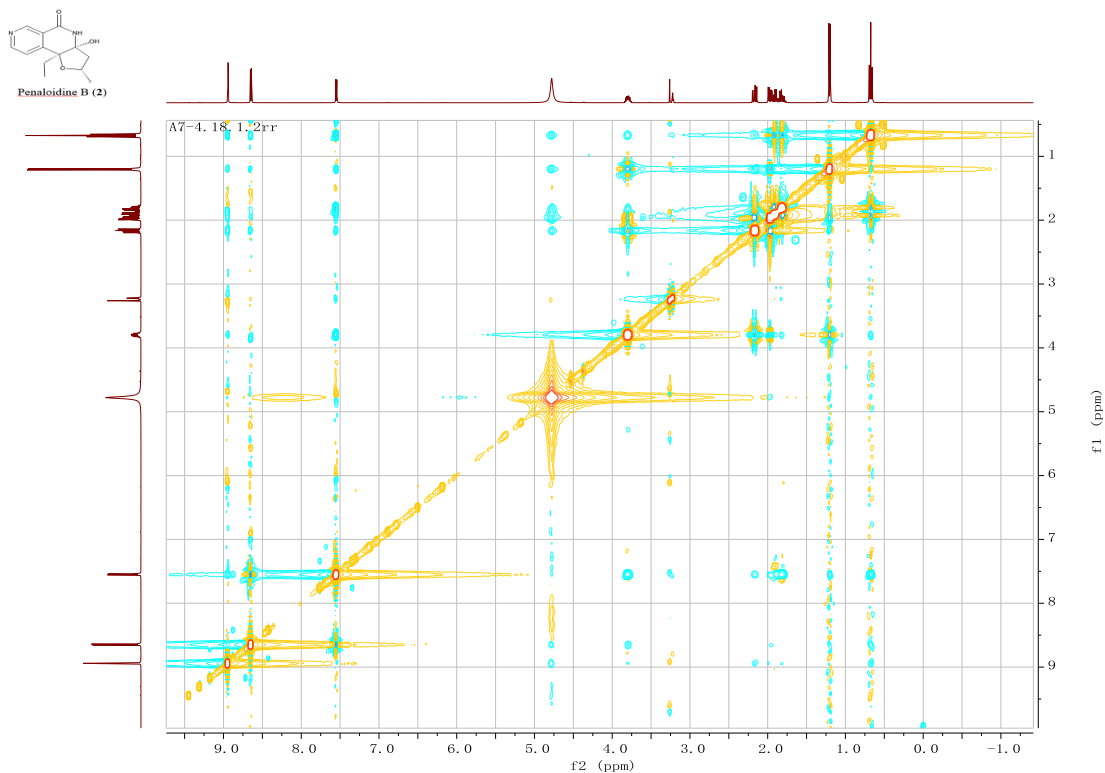

Figure S20. NOESY spectrum of penaloidine B (2) in methanol- $d_4$  (400 MHz).

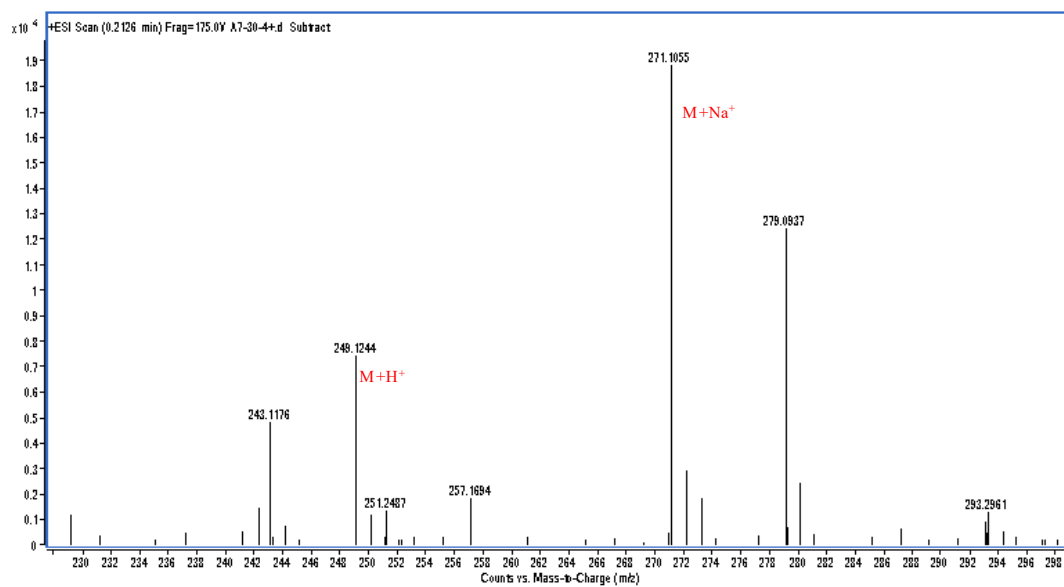

MS Formula Results: + Scan (0.2126 min) Sub (A7-30-4+.d)

| m/z                                 | Ion                                                           | Formula                                                          | Abundance |             |          |            |            |             |               |
|-------------------------------------|---------------------------------------------------------------|------------------------------------------------------------------|-----------|-------------|----------|------------|------------|-------------|---------------|
| 249.1244                            | (M+H) <sup>+</sup>                                            | C <sub>13</sub> H <sub>17</sub> N <sub>2</sub> O <sub>3</sub>    | 7463.1    |             |          |            |            |             |               |
| Best                                | Formula (M)                                                   | Ion Formula                                                      | Score     | Cross Score | Calc m/z | Diff (ppm) | Mass Match | Abund Match | Spacing Match |
| <input checked="" type="checkbox"/> | C <sub>13</sub> H <sub>16</sub> N <sub>2</sub> O <sub>3</sub> | C <sub>13</sub> H <sub>17</sub> N <sub>2</sub> O <sub>3</sub>    | 81.23     | 249.1234    | -4.17    | 91.13      | 91.03      | 49.65       |               |
| 271.1055                            | (M+Na) <sup>+</sup>                                           | C <sub>13</sub> H <sub>16</sub> N <sub>2</sub> O <sub>3</sub>    | 18867.5   |             |          |            |            |             |               |
| Best                                | Formula (M)                                                   | Ion Formula                                                      | Score     | Cross Score | Calc m/z | Diff (ppm) | Mass Match | Abund Match | Spacing Match |
| <input checked="" type="checkbox"/> | C <sub>13</sub> H <sub>16</sub> N <sub>2</sub> O <sub>3</sub> | C <sub>13</sub> H <sub>16</sub> N <sub>2</sub> Na O <sub>3</sub> | 68.68     | 271.1053    | -0.95    | 99.72      | 32.51      | 50          |               |

Figure S21. HRESIMS spectrum of penaloidine B (2).

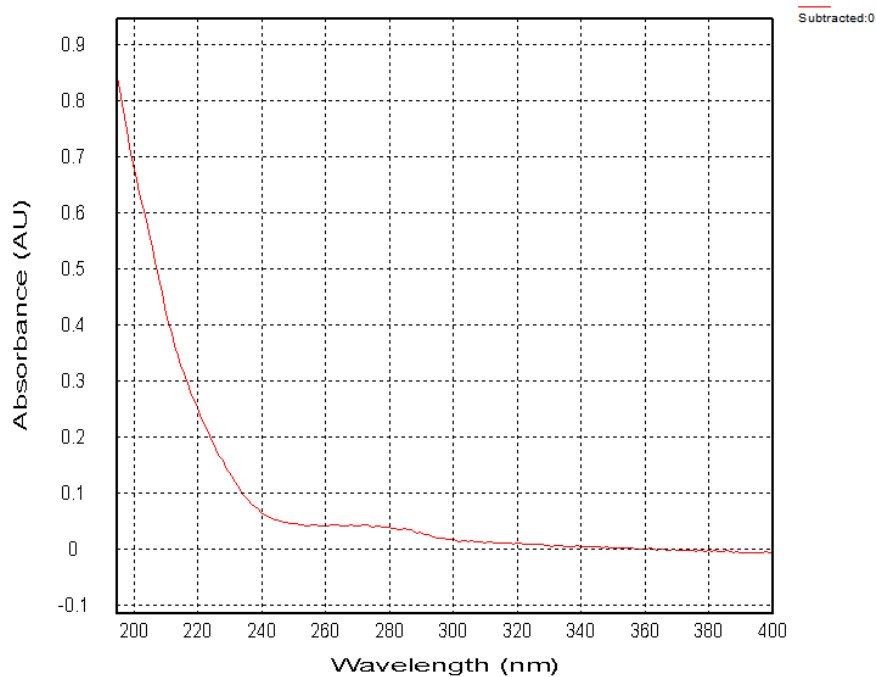

**Figure S22.** UV Spectrum of penaloidine B (2) in methanol

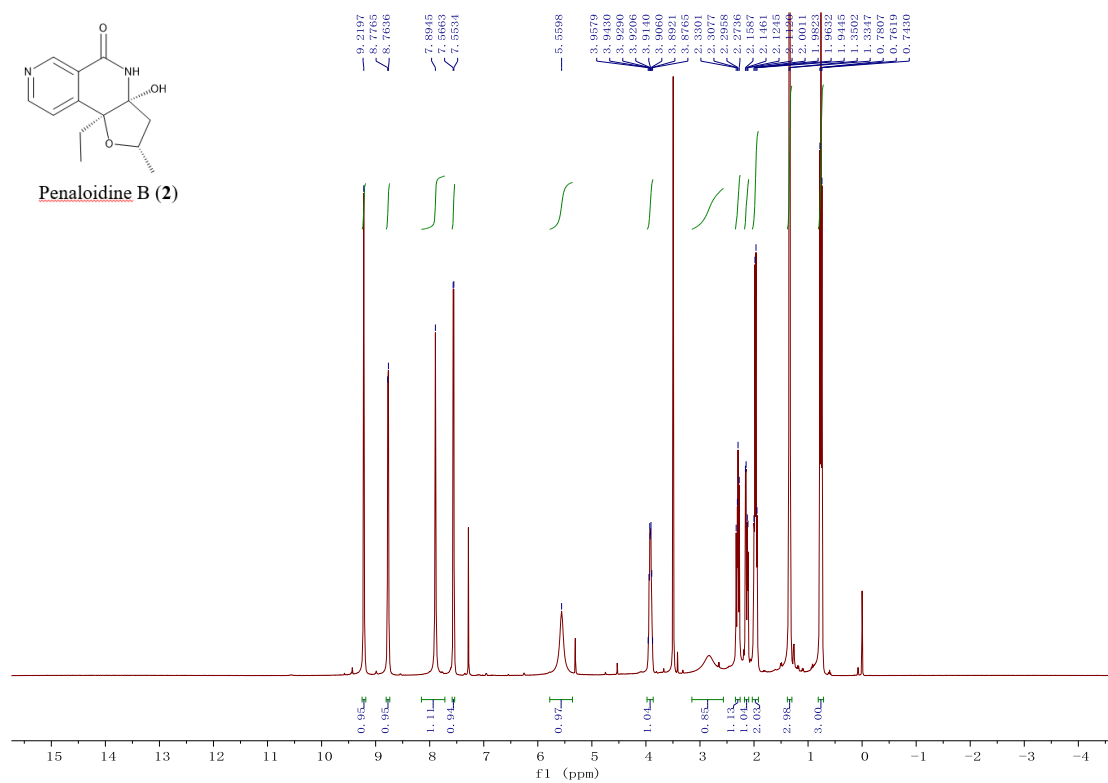

**Figure S23.**  $^1\text{H}$  NMR spectrum of penaloidine B (2) in  $\text{CDCl}_3$  (400 MHz).



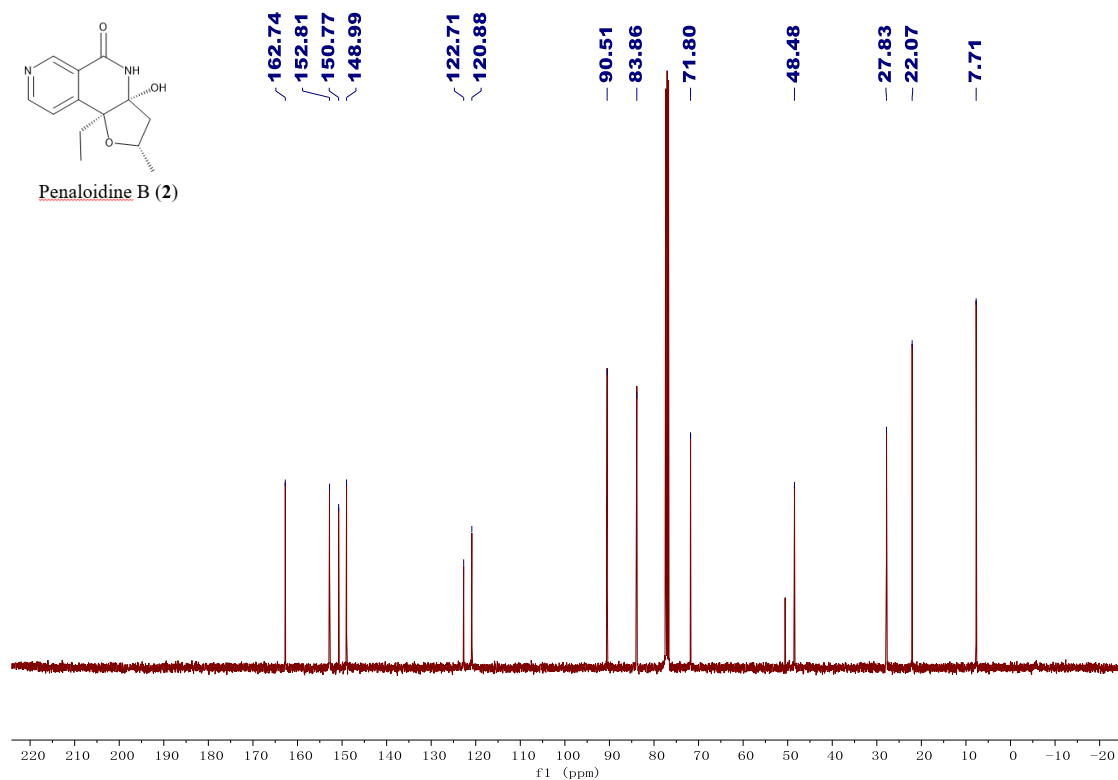

**Figure S24.** <sup>13</sup>C NMR spectrum of penaloidine B (2) in CDCl<sub>3</sub> (400 MHz).

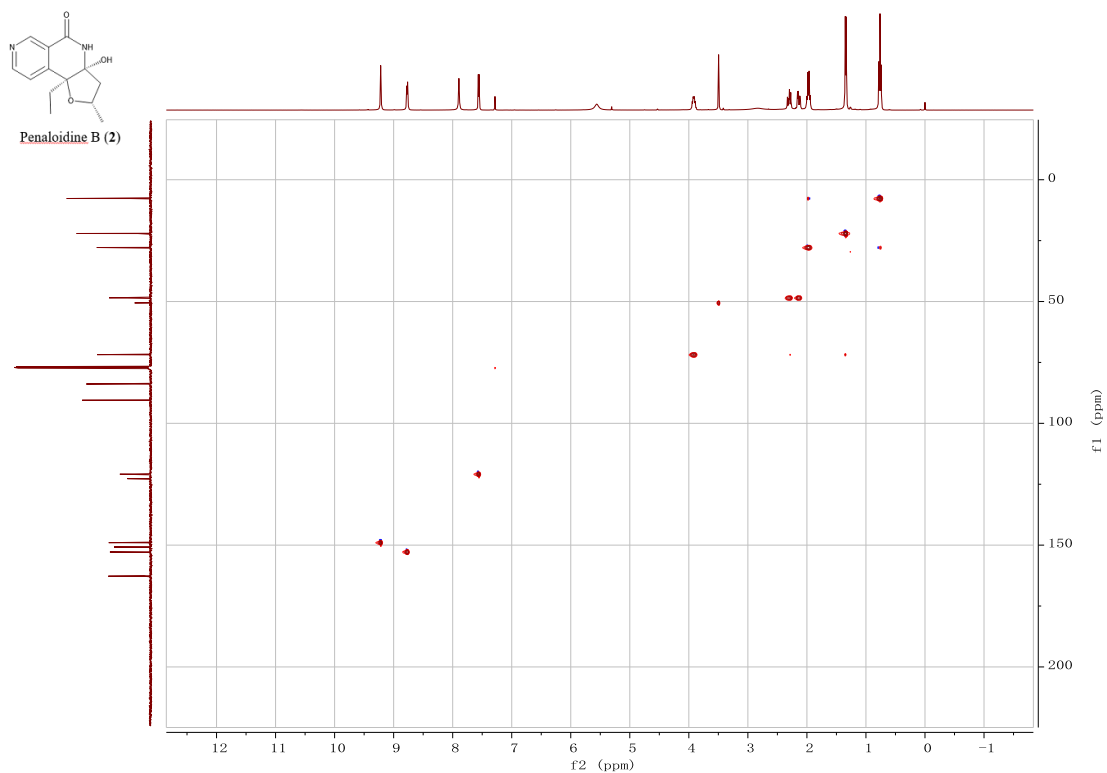

**Figure S25.** HSQC spectrum of penaloidine B (2) in CDCl<sub>3</sub> (400 MHz).

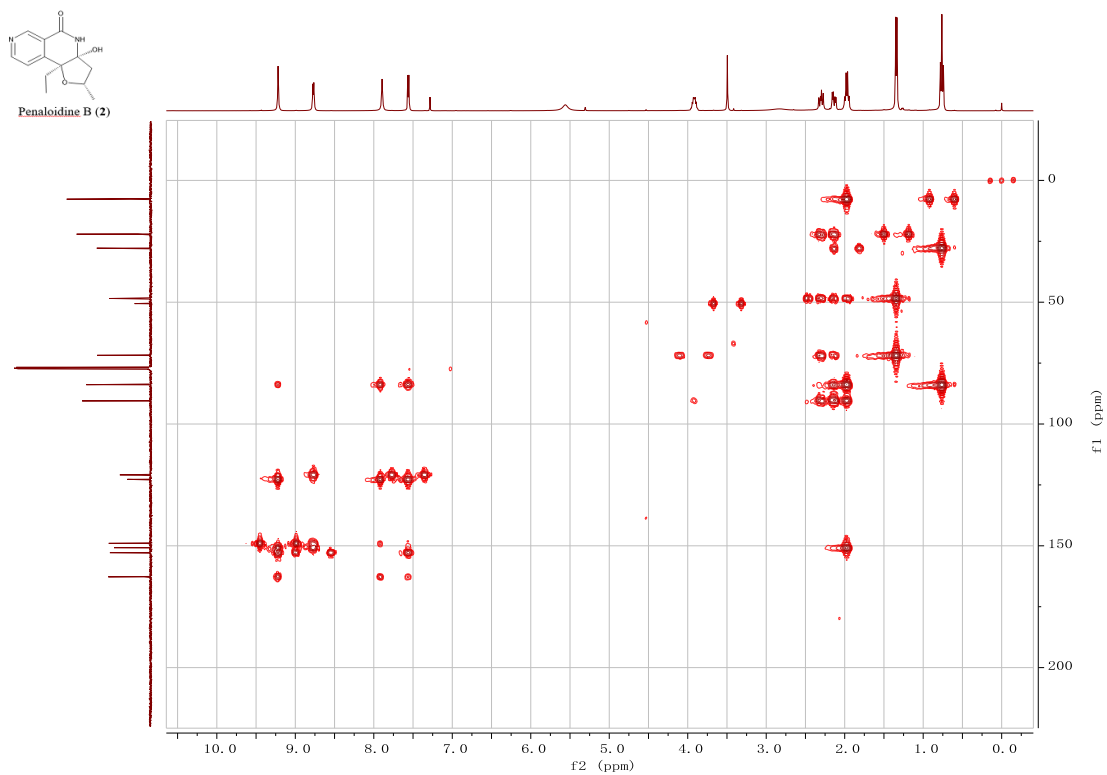

**Figure S26.** HMBC spectrum of penaloidine B (2) in  $\text{CDCl}_3$  (400 MHz).

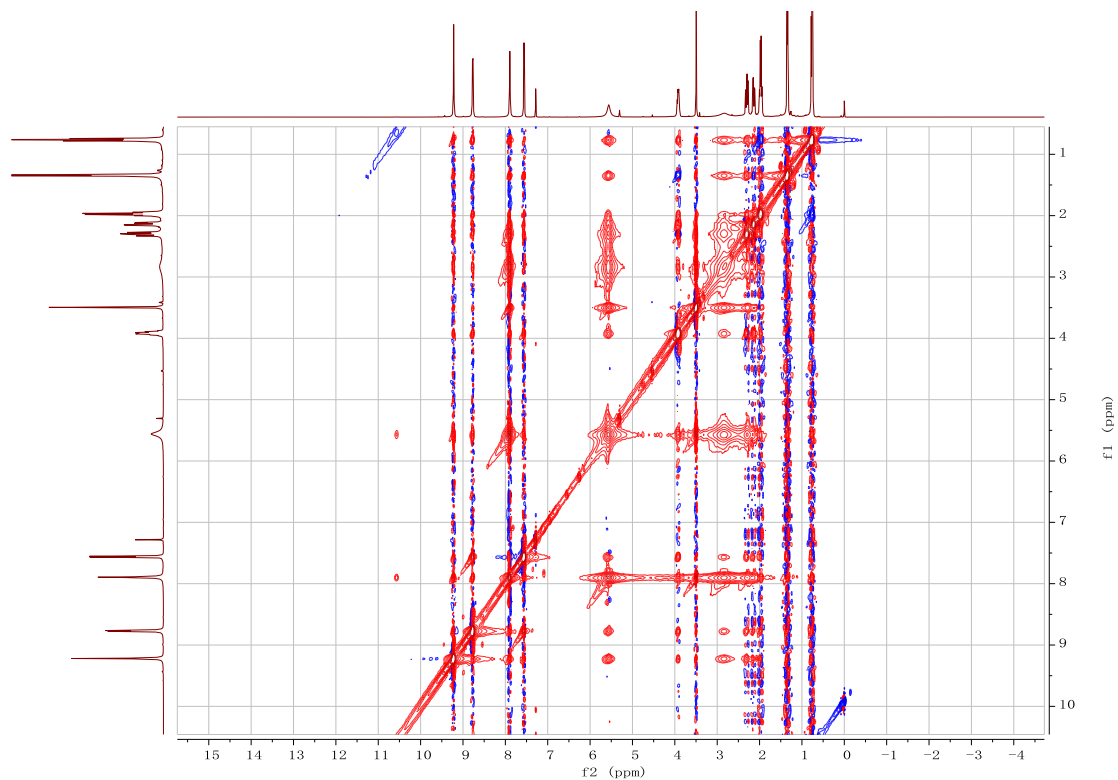

**Figure S27.** NOESY spectrum of penaloidine B (2) in  $\text{CDCl}_3$  (400 MHz).

**Table S3**  $^1\text{H}$  NMR (400MHz) and  $^{13}\text{C}$  NMR (100MHz) spectroscopic data in  $\text{CDCl}_3$  of penaloidine B (**2**).

| Pos. | <b>2</b> (in $\text{CDCl}_3$ ) |                     |
|------|--------------------------------|---------------------|
|      | $\delta_{\text{H}}$ (J in Hz)  | $\delta_{\text{C}}$ |
| 1    | 8.76, d (5.2)                  | 152.8, CH           |
| 2    | 9.2, brs                       | 148.9, CH           |
| 3    |                                | 122.7, C            |
| 4    |                                | 162.7, C            |
| 5    |                                | 90.5, C             |
| 6a   | 2.13, dd (5.0, 13.7)           | 48.5, $\text{CH}_2$ |
| 6b   | 2.29, dd (8.9, 13.6)           |                     |
| 7    | 3.92, m                        | 71.8, CH            |
| 8    |                                | 83.9, C             |
| 9    |                                | 150.8, C            |
| 10   | 7.56, brd (5.2)                | 120.9, CH           |
| 11   | 1.97, m                        | 27.8, $\text{CH}_2$ |
| 12   | 0.76, t (7.5)                  | 7.7, $\text{CH}_3$  |
| 13   | 1.34, d (6.2)                  | 22.1 $\text{CH}_3$  |
| -NH- | 7.89, s                        |                     |
| OH-5 | 5.56, s                        |                     |

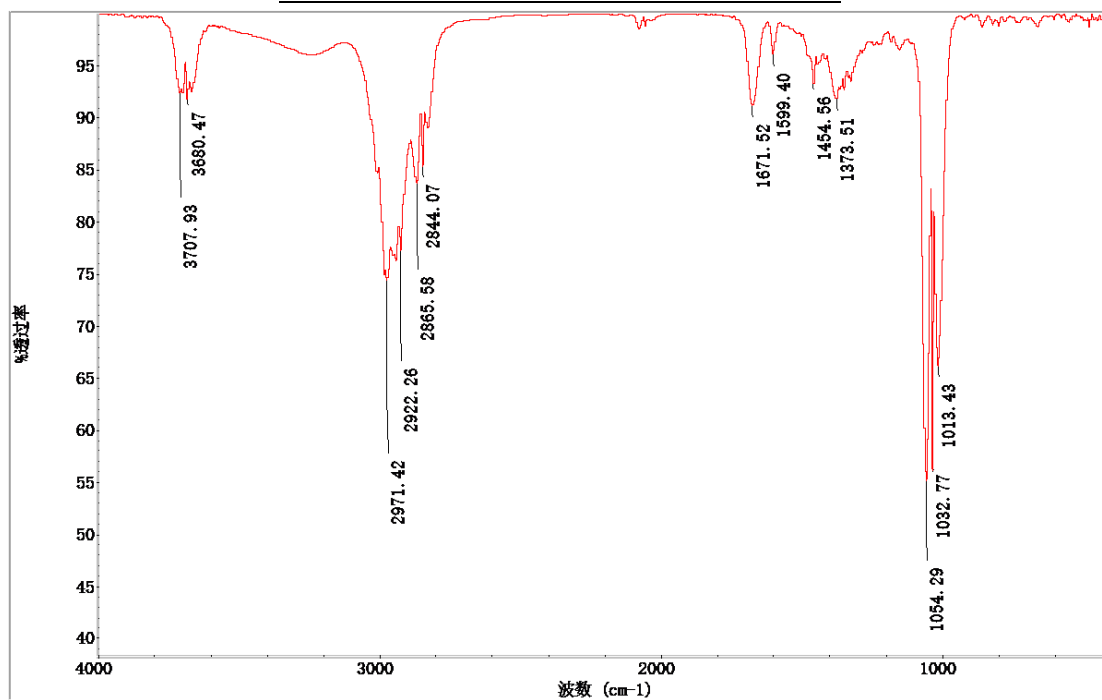

**Figure S28.** IR spectrum of penaloidine B (**2**)

#### NMR Computational Methods

**Table S4.** Energy (298.15K) analysis for a (5R,7R,8S)-1, b (5S,7R,8S)-1, c (5R,7S,8S)-1 and d (5S,7S,8R)-1

| Conf.    | G (Hartree) | $\Delta G$ (Kcal/mol) | Boltzmann Distribution |
|----------|-------------|-----------------------|------------------------|
| <b>a</b> |             |                       |                        |
| a1       | -840.017919 | 0.002332              | 0.041764086            |
| a2       | -840.017949 | 0.002362              | 0.040457317            |
| a3       | -840.016993 | 0.001406              | 0.111415391            |
| a4       | -840.015587 | 0                     | 0.494290024            |
| a5       | -840.016021 | 0.000434              | 0.312073181            |
| <b>b</b> |             |                       |                        |
| b1       | -840.00761  | 0.004058              | 0.012926388            |

|          |             |          |             |
|----------|-------------|----------|-------------|
| b2       | -840.006687 | 0.003135 | 0.034374691 |
| b3       | -840.003552 | 0        | 0.952698921 |
| <b>c</b> |             |          |             |
| c1       | -840.00761  | 0.004058 | 0.012926388 |
| c2       | -840.006687 | 0.003135 | 0.034374691 |
| c3       | -840.003552 | 0        | 0.952698921 |
| <b>d</b> |             |          |             |
| d1       | -840.017919 | 0.002332 | 0.039752833 |
| d2       | -840.017949 | 0.002362 | 0.038508995 |
| d3       | -840.017738 | 0.002151 | 0.048157474 |
| d4       | -840.016993 | 0.001406 | 0.106049908 |
| d5       | -840.015587 | 0        | 0.470486265 |
| d6       | -840.016021 | 0.000434 | 0.297044525 |

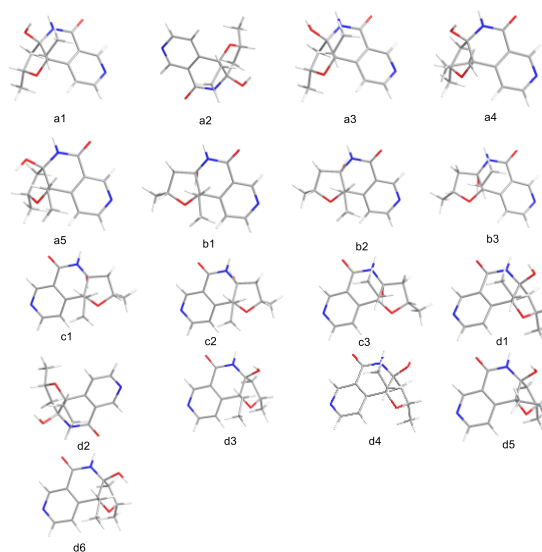

**Figure S29.** Mpw1pw91/6-311+G(d,p) (chloroform) optimized lowest energy conformers for 1(a-d).

| Nuclei | sp2?? | DP4+        | 100.00%  | 0.00%    | 0.00%    | 0.00%    |
|--------|-------|-------------|----------|----------|----------|----------|
|        |       | xperimental | Isomer 1 | Isomer 2 | Isomer 3 | Isomer 4 |
| C      | x     | 153.4       | 160.7    | 161.6    | 161.5    | 161.7    |
| C      | x     | 149         | 155.6    | 155.7    | 155.7    | 155.6    |
| C      | x     | 123.1       | 129.8    | 129.5    | 129.4    | 124.8    |
| C      | x     | 163.7       | 167.3    | 173.1    | 173.1    | 167.3    |
| C      |       | 91.1        | 95.2     | 91.8     | 91.6     | 95.2     |
| C      |       | 49.3        | 49.2     | 42.8     | 42.5     | 49.1     |
| C      |       | 74.1        | 77.5     | 77.6     | 77.4     | 77.6     |
| C      |       | 83.9        | 86.3     | 90.5     | 90.3     | 90.3     |
| C      | x     | 155.1       | 162.3    | 156.1    | 156.0    | 162.2    |
| C      | x     | 123.3       | 127.2    | 124.6    | 124.5    | 127.3    |
| C      |       | 29.6        | 32.7     | 35.5     | 35.2     | 32.5     |
| C      |       | 8.1         | 10.5     | 11.4     | 11.1     | 10.4     |
| C      |       | 22.2        | 23.1     | 23.3     | 23.0     | 23.1     |
| H      | x     | 8.65        | 9.16     | 9.18     | 9.14     | 9.16     |
| H      | x     | 8.94        | 9.36     | 9.44     | 9.40     | 9.37     |
| H      |       | 1.96        | 1.77     | 1.91     | 1.86     | 1.77     |
| H      |       | 2.17        | 2.23     | 2.76     | 2.71     | 2.23     |
| H      |       | 3.79        | 4.49     | 4.76     | 4.71     | 4.72     |
| H      |       | 7.55        | 7.90     | 7.73     | 7.69     | 7.69     |
| H      | x     | 1.86        | 1.89     | 2.04     | 1.99     | 1.88     |
| H      |       | 0.67        | 0.99     | 0.75     | 0.69     | 1.00     |
| H      |       | 1.2         | 1.16     | 1.39     | 1.34     | 1.16     |

a                      b                      c                      d

| Functional       | Solvent? |          | Basis Set     |          |
|------------------|----------|----------|---------------|----------|
|                  | PCM      |          | 6-311+G(d, p) |          |
| mPW1PW91         | Isomer 1 | Isomer 2 | Isomer 3      | Isomer 4 |
| sDP4+ (H data)   | 78.42%   | 8.43%    | 8.47%         | 4.68%    |
| sDP4+ (C data)   | 95.44%   | 0.00%    | 0.00%         | 4.56%    |
| sDP4+ (all data) | 99.72%   | 0.00%    | 0.00%         | 0.28%    |
| uDP4+ (H data)   | 90.23%   | 0.30%    | 1.27%         | 8.20%    |
| uDP4+ (C data)   | 97.71%   | 0.00%    | 0.00%         | 2.29%    |
| uDP4+ (all data) | 99.79%   | 0.00%    | 0.00%         | 0.21%    |
| DP4+ (H data)    | 99.28%   | 0.04%    | 0.15%         | 0.54%    |
| DP4+ (C data)    | 99.89%   | 0.00%    | 0.00%         | 0.11%    |
| DP4+ (all data)  | 100.00%  | 0.00%    | 0.00%         | 0.00%    |

**Figure S30.** DP4+ evaluation of theoretical and experimental data of penaloidine A (1)

**Table S5.** Calculated (calc.) and experimental (exp.) <sup>1</sup>H NMR chemical shift values of **a-d** of **1** at the mPW1PW91/6-311+G(d,p) level in chloroform and total absolute deviation (TAD) and mean absolute error (MAE).

| H   | exp. | calc. <b>a</b> | calc. <b>a</b> - exp. | calc. <b>b</b> | calc. <b>b</b> - exp. | calc. <b>c</b> | calc. <b>c</b> - exp. | calc. <b>d</b> | calc. <b>d</b> exp. |
|-----|------|----------------|-----------------------|----------------|-----------------------|----------------|-----------------------|----------------|---------------------|
| 1   | 8.65 | 9.16           | 0.51                  | 9.18           | 0.53                  | 9.14           | 0.49                  | 9.16           | 0.51                |
| 2   | 8.94 | 9.36           | 0.42                  | 9.44           | 0.50                  | 9.40           | 0.46                  | 9.37           | 0.43                |
| 3   | 1.96 | 1.77           | 0.19                  | 1.91           | 0.05                  | 1.86           | 0.10                  | 1.77           | 0.19                |
| 4   | 2.17 | 2.23           | 0.06                  | 2.76           | 0.59                  | 2.71           | 0.54                  | 2.23           | 0.06                |
| 5   | 3.79 | 4.49           | 0.70                  | 4.76           | 0.97                  | 4.71           | 0.92                  | 4.72           | 0.93                |
| 6   | 7.55 | 7.90           | 0.35                  | 7.73           | 0.18                  | 7.69           | 0.14                  | 7.69           | 0.14                |
| 7   | 1.86 | 1.89           | 0.03                  | 2.04           | 0.18                  | 1.99           | 0.13                  | 1.88           | 0.02                |
| 8   | 0.67 | 0.99           | 0.32                  | 0.75           | 0.08                  | 0.69           | 0.02                  | 1.00           | 0.33                |
| 9   | 1.2  | 1.16           | 0.04                  | 1.39           | 0.19                  | 1.34           | 0.14                  | 1.16           | 0.04                |
| TAD |      |                | 2.62                  |                | 3.27                  |                | 2.94                  |                | 2.65                |
| MAE |      |                | 0.29                  |                | 0.36                  |                | 0.33                  |                | 0.29                |

**Table S6.** Energy (298.15K) analysis for **a** (5R,7S,8S)-2, **b** (5S,7S,8S)-2, **c** (5S,7R,8R)-2 and **d** (5R,7R,8R)-2

| Conf.    | G (Hartree) | $\Delta$ G (Kcal/mol) | Boltzmann Distribution |
|----------|-------------|-----------------------|------------------------|
| <b>a</b> |             |                       |                        |
| a1       | -840.017731 | 0.004427              | 0.007039332            |
| a2       | -840.016462 | 0.003158              | 0.027009786            |
| a3       | -840.017576 | 0.004272              | 0.00829587             |
| a4       | -840.016533 | 0.003229              | 0.025052276            |
| a5       | -840.016602 | 0.003298              | 0.023285931            |
| a6       | -840.014894 | 0.00159               | 0.142268804            |
| a7       | -840.013304 | 0                     | 0.767048               |
| <b>b</b> |             |                       |                        |
| b1       | -840.006211 | 0.000264              | 0.43051616             |
| b2       | -840.005947 | 0                     | 0.56948384             |
| <b>c</b> |             |                       |                        |
| c1       | -840.017731 | 0.004427              | 0.008206921            |
| c2       | -840.016462 | 0.003158              | 0.031489803            |
| c3       | -840.017576 | 0.004272              | 0.009671877            |
| c4       | -840.016533 | 0.003229              | 0.029207607            |
| c5       | -840.016602 | 0.003298              | 0.027148285            |
| c6       | -840.043974 | 0.03067               | 6.87443E-15            |
| c7       | -840.013304 | 0                     | 0.894275508            |
| <b>d</b> |             |                       |                        |
| d1       | -840.006211 | 0.000264              | 0.43051616             |
| d2       | -840.005947 | 0                     | 0.56948384             |

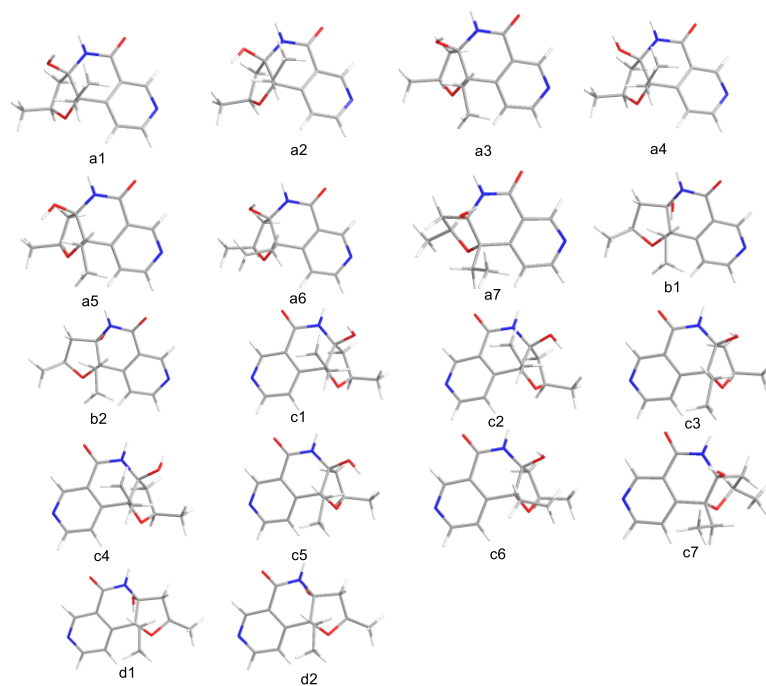

**Figure S31.** Mpw1pw91/6-311+G(d,p) (chloroform) optimized lowest energy conformers for 2 (a-d).

| Nuclei | sp2? | DP4+       | 100.00%  | 0.00%    | 0.00%    | 0.00%    |
|--------|------|------------|----------|----------|----------|----------|
|        |      | xperimenta | Isomer 1 | Isomer 2 | Isomer 3 | Isomer 4 |
| C      | x    | 152.2      | 153.9    | 160.2    | 160.8    | 160.2    |
| C      |      | 147.8      | 155.0    | 156.4    | 157.2    | 156.4    |
| C      | x    | 123.4      | 125.7    | 127.9    | 125.6    | 127.9    |
| C      | x    | 162.3      | 167.2    | 172.1    | 167.2    | 172.1    |
| C      |      | 89.8       | 95.7     | 93.4     | 95.5     | 93.4     |
| C      |      | 48.1       | 50.3     | 44.0     | 50.6     | 44.0     |
| C      |      | 71.8       | 76.1     | 81.0     | 76.1     | 81.0     |
| C      |      | 83.8       | 85.2     | 89.8     | 85.0     | 89.8     |
| C      | x    | 151.4      | 155.3    | 158.8    | 154.2    | 158.8    |
| C      | x    | 121.1      | 127.7    | 125.5    | 128.1    | 125.5    |
| C      |      | 27.8       | 34.4     | 37.3     | 34.7     | 37.3     |
| C      |      | 6.7        | 11.2     | 8.8      | 11.1     | 8.8      |
| C      |      | 20.8       | 22.1     | 23.9     | 22.0     | 23.9     |
| H      | x    | 8.65       | 9.18     | 9.02     | 9.18     | 9.02     |
| H      | x    | 8.94       | 9.33     | 9.41     | 9.67     | 9.41     |
| H      |      | 1.96       | 2.05     | 2.26     | 2.04     | 2.26     |
| H      |      | 2.17       | 2.32     | 2.39     | 2.37     | 2.39     |
| H      |      | 3.79       | 4.07     | 4.69     | 4.09     | 4.69     |
| H      | x    | 7.55       | 7.81     | 7.73     | 7.79     | 7.73     |
| H      |      | 1.86       | 2.28     | 1.76     | 2.34     | 1.76     |
| H      |      | 0.67       | 0.86     | 1.00     | 0.79     | 0.85     |
| H      |      | 1.2        | 1.25     | 1.51     | 1.24     | 1.51     |

| Functional       | Solvent? |          | Basis Set     |          |
|------------------|----------|----------|---------------|----------|
| mPW1PW91         | PCM      |          | 6-311+G(d, p) |          |
|                  | Isomer 1 | Isomer 2 | Isomer 3      | Isomer 4 |
| sDP4+ (H data)   | 69.54%   | 2.35%    | 26.03%        | 2.08%    |
| sDP4+ (C data)   | 98.62%   | 0.32%    | 0.73%         | 0.32%    |
| sDP4+ (all data) | 99.70%   | 0.01%    | 0.28%         | 0.01%    |
| uDP4+ (H data)   | 94.32%   | 0.85%    | 2.68%         | 2.15%    |
| uDP4+ (C data)   | 75.12%   | 0.08%    | 24.72%        | 0.08%    |
| uDP4+ (all data) | 99.07%   | 0.00%    | 0.93%         | 0.00%    |
| DP4+ (H data)    | 98.85%   | 0.03%    | 1.05%         | 0.07%    |
| DP4+ (C data)    | 99.75%   | 0.00%    | 0.24%         | 0.00%    |
| DP4+ (all data)  | 100.00%  | 0.00%    | 0.00%         | 0.00%    |

**Figure S32.** DP4+ evaluation of theoretical and experimental data of penaloidine B (2)

**Table S7.** Calculated (calc.) and experimental (exp.)  $^{13}\text{C}$  NMR chemical shift values of **a-b** of **2** at the mPW1PW91/6-311+G(d,p) level in chloroform and total absolute deviation (TAD) and mean absolute error (MAE).

| C   | exp.  | calc. a | calc. a-exp. | calc. b | calc.b- exp. | calc. c | calc.c-exp. | calc. d | calc.d-exp. |
|-----|-------|---------|--------------|---------|--------------|---------|-------------|---------|-------------|
| 1   | 152.2 | 158.9   | 6.7          | 160.2   | 8            | 160.8   | 8.6         | 160.2   | 8           |
| 2   | 147.8 | 155.0   | 7.2          | 156.4   | 8.6          | 157.2   | 9.4         | 156.4   | 8.6         |
| 3   | 123.4 | 125.7   | 2.3          | 127.9   | 4.5          | 125.6   | 2.2         | 127.9   | 4.5         |
| 4   | 162.3 | 167.2   | 4.9          | 172.1   | 9.8          | 167.2   | 4.9         | 172.1   | 9.8         |
| 5   | 89.8  | 95.7    | 5.9          | 93.4    | 3.6          | 95.5    | 5.7         | 93.4    | 3.6         |
| 6   | 48.1  | 50.3    | 2.2          | 44.0    | 4.1          | 50.6    | 2.5         | 44.0    | 4.1         |
| 7   | 71.8  | 76.1    | 4.3          | 81.0    | 9.2          | 76.1    | 4.3         | 81.0    | 9.2         |
| 8   | 83.8  | 85.2    | 1.4          | 89.8    | 6            | 85.0    | 1.2         | 89.8    | 6           |
| 9   | 151.4 | 155.3   | 3.9          | 158.8   | 7.4          | 154.2   | 2.8         | 158.8   | 7.4         |
| 10  | 121.1 | 127.7   | 6.6          | 125.5   | 4.4          | 128.1   | 7           | 125.5   | 4.4         |
| 11  | 27.8  | 34.4    | 6.6          | 37.3    | 9.5          | 34.7    | 6.9         | 37.3    | 9.5         |
| 12  | 6.7   | 11.2    | 4.5          | 8.8     | 2.1          | 11.1    | 4.4         | 8.8     | 2.1         |
| 13  | 20.8  | 22.1    | 1.3          | 23.9    | 3.1          | 22.0    | 1.2         | 23.9    | 3.1         |
| TAD |       |         | 57.8         |         | 80.3         |         | 61.1        |         | 80.3        |
| MAE |       |         | 4.5          |         | 6.2          |         | 4.7         |         | 6.2         |

**Table S8.** Calculated (calc.) and experimental (exp.)  $^1\text{H}$  NMR chemical shift values of **a-d** of **2** at the mPW1PW91/6-311+G(d,p) level in chloroform and total absolute deviation (TAD) and mean absolute error (MAE).

| H   | exp. | calc. a | calc. a- exp. | calc. b | calc.b- exp. | calc. c | calc.c- exp. | calc. d | calc.d- exp. |
|-----|------|---------|---------------|---------|--------------|---------|--------------|---------|--------------|
| 1   | 8.65 | 9.18    | 0.53          | 9.02    | 0.37         | 9.18    | 0.53         | 9.02    | 0.37         |
| 2   | 8.94 | 9.33    | 0.39          | 9.41    | 0.47         | 9.67    | 0.73         | 9.41    | 0.47         |
| 3   | 1.96 | 2.05    | 0.09          | 2.26    | 0.3          | 2.04    | 0.08         | 2.26    | 0.3          |
| 4   | 2.17 | 2.32    | 0.15          | 2.39    | 0.22         | 2.37    | 0.2          | 2.39    | 0.22         |
| 5   | 3.79 | 4.07    | 0.28          | 4.69    | 0.9          | 4.09    | 0.3          | 4.69    | 0.9          |
| 6   | 7.55 | 7.81    | 0.26          | 7.73    | 0.18         | 7.79    | 0.24         | 7.73    | 0.18         |
| 7   | 1.86 | 2.28    | 0.42          | 1.76    | 0.1          | 2.34    | 0.48         | 1.76    | 0.1          |
| 8   | 0.67 | 0.86    | 0.19          | 1.00    | 0.33         | 0.79    | 0.12         | 0.85    | 0.18         |
| 9   | 1.2  | 1.25    | 0.05          | 1.51    | 0.31         | 1.24    | 0.04         | 1.51    | 0.31         |
| TAD |      |         | 2.36          |         | 3.18         |         | 2.72         |         | 3.03         |
| MAE |      |         | 0.26          |         | 0.35         |         | 0.30         |         | 0.34         |

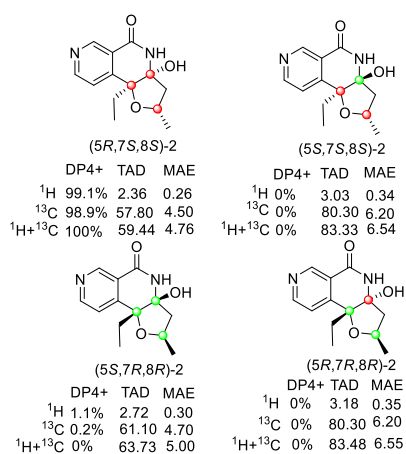

**Figure S33.** Total absolute deviation (TAD), mean absolute error (MAE), and DP4+ probability analyses for **2** and its three diastereomers.

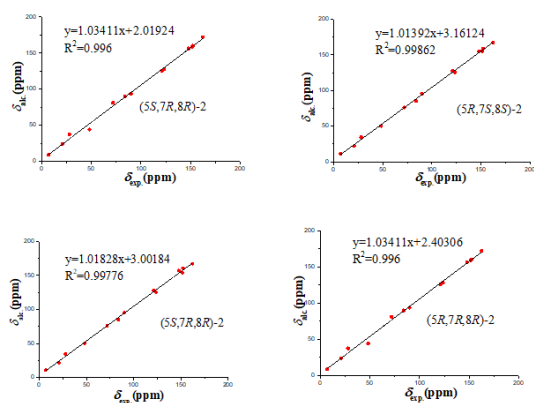

**Figure S34.** Linear correlations between the experimental and calculated  $^{13}\text{C}$  NMR chemical shifts for **2** and its three diastereomers at the PCM/mPW1PW91/6-311+G(d,p) level.

### ECD calculation details for compounds 1-2

The ECD spectra were simulated by overlapping Gaussian functions for each transition according to:

$$\Delta\varepsilon(E) = \frac{1}{2.296 \times 10^{-39} \sqrt{\pi} \sigma} \sum_i^A \Delta E_i R_i e^{[-(E - \Delta E_i)^2 / \sigma^2]}$$

The  $\sigma$  represented the width of the band at 1/e height, and  $\Delta E_i$  and  $R_i$  were the excitation energies and rotational strengths for transition  $i$ , respectively.  $R_{\text{vel}}$  had been used in this work.

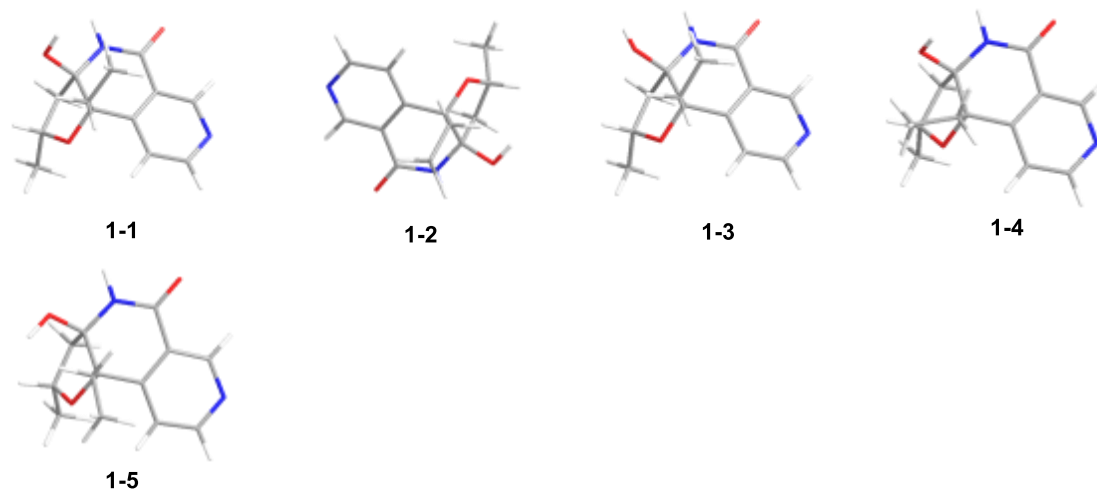

**Figure S35.** Optimized geometries of predominant conformers for **1**.

**Table S9.** Cartesian Coordinates of the Lowest Energy Conformers for Compound **1**.

| <b>1-1</b>    |               |             |                         |           |           |
|---------------|---------------|-------------|-------------------------|-----------|-----------|
| Center Number | Atomic Number | Atomic Type | Coordinates (Angstroms) |           |           |
|               |               |             | X                       | Y         | Z         |
| 1             | 7             | 0           | -3.40423                | 1.287448  | -0.356581 |
| 2             | 6             | 0           | -2.621633               | 2.095413  | 0.389278  |
| 3             | 6             | 0           | -1.319859               | 1.785282  | 0.752003  |
| 4             | 6             | 0           | -0.764575               | 0.570298  | 0.323425  |
| 5             | 6             | 0           | -1.560095               | -0.276333 | -0.459648 |
| 6             | 6             | 0           | -2.856981               | 0.116679  | -0.764723 |
| 7             | 6             | 0           | 0.65019                 | 0.165145  | 0.710942  |
| 8             | 6             | 0           | 1.216408                | -0.924403 | -0.259584 |
| 9             | 7             | 0           | 0.260873                | -1.857672 | -0.770912 |
| 10            | 6             | 0           | -1.065195               | -1.576256 | -0.956913 |



|    |   |   |           |           |           |
|----|---|---|-----------|-----------|-----------|
| 11 | 8 | 0 | 1.481707  | 1.343414  | 0.507399  |
| 12 | 6 | 0 | 2.423127  | 1.069713  | -0.542165 |
| 13 | 6 | 0 | 1.846641  | -0.077401 | -1.351223 |
| 14 | 8 | 0 | 2.239801  | -1.726621 | 0.303736  |
| 15 | 6 | 0 | 0.742887  | -0.187779 | 2.212098  |
| 16 | 6 | 0 | -0.129732 | -1.348883 | 2.671525  |
| 17 | 6 | 0 | 2.647543  | 2.327076  | -1.360455 |
| 18 | 8 | 0 | -1.806005 | -2.376847 | -1.511677 |
| 19 | 1 | 0 | -3.081859 | 3.029583  | 0.700152  |
| 20 | 1 | 0 | -0.744667 | 2.483196  | 1.353962  |
| 21 | 1 | 0 | -3.513244 | -0.51125  | -1.36287  |
| 22 | 1 | 0 | 0.587385  | -2.738237 | -1.17365  |
| 23 | 1 | 0 | 3.364829  | 0.770064  | -0.066517 |
| 24 | 1 | 0 | 1.08898   | 0.286667  | -2.056243 |
| 25 | 1 | 0 | 2.622932  | -0.597764 | -1.922098 |
| 26 | 1 | 0 | 1.78889   | -2.411939 | 0.823248  |
| 27 | 1 | 0 | 1.788267  | -0.40027  | 2.47121   |
| 28 | 1 | 0 | 0.486762  | 0.69491   | 2.813709  |
| 29 | 1 | 0 | 0.042912  | -1.542614 | 3.735437  |
| 30 | 1 | 0 | -1.193345 | -1.123349 | 2.549424  |
| 31 | 1 | 0 | 0.090382  | -2.270902 | 2.128579  |
| 32 | 1 | 0 | 3.039737  | 3.12907   | -0.726036 |
| 33 | 1 | 0 | 3.353481  | 2.148377  | -2.176883 |
| 34 | 1 | 0 | 1.705691  | 2.695152  | -1.782007 |

| 1-2           |               |             |                         |           |           |
|---------------|---------------|-------------|-------------------------|-----------|-----------|
| Center Number | Atomic Number | Atomic Type | Coordinates (Angstroms) |           |           |
|               |               |             | X                       | Y         | Z         |
| 1             | 7             | 0           | -3.399483               | 1.236556  | -0.020465 |
| 2             | 6             | 0           | -2.618488               | 2.001096  | 0.588043  |
| 3             | 6             | 0           | -1.308801               | 1.684599  | 0.915709  |
| 4             | 6             | 0           | -0.745146               | 0.510228  | 0.397373  |
| 5             | 6             | 0           | -1.53999                | -0.293061 | -0.433297 |
| 6             | 6             | 0           | -2.844969               | 0.10121   | -0.695646 |
| 7             | 6             | 0           | 0.680851                | 0.094076  | 0.732357  |
| 8             | 6             | 0           | 1.251649                | -0.866207 | -0.353928 |
| 9             | 7             | 0           | 0.307708                | -1.799125 | -0.88808  |
| 10            | 6             | 0           | -1.031876               | -1.554654 | -1.01409  |
| 11            | 8             | 0           | 1.50849                 | 1.288266  | 0.64983   |
| 12            | 6             | 0           | 2.284646                | 1.251892  | -0.559465 |
| 13            | 6             | 0           | 1.757777                | 0.106936  | -1.407709 |
| 14            | 8             | 0           | 2.341607                | -1.662321 | 0.085596  |
| 15            | 6             | 0           | 0.786481                | -0.418183 | 2.185701  |
| 16            | 6             | 0           | 0.051231                | -1.718777 | 2.478828  |
| 17            | 6             | 0           | 2.204412                | 2.599269  | -1.253104 |
| 18            | 8             | 0           | -1.776182               | -2.343454 | -1.580647 |
| 19            | 1             | 0           | -3.08786                | 2.904589  | 0.968181  |
| 20            | 1             | 0           | -0.73673                | 2.345321  | 1.56064   |
| 21            | 1             | 0           | -3.50125                | -0.495799 | -1.324457 |
| 22            | 1             | 0           | 0.659847                | -2.678567 | -1.268297 |
| 23            | 1             | 0           | 3.323191                | 1.058047  | -0.26634  |
| 24            | 1             | 0           | 0.943218                | 0.450822  | -2.057155 |
| 25            | 1             | 0           | 2.542086                | -0.308735 | -2.049348 |
| 26            | 1             | 0           | 2.945891                | -1.091586 | 0.590503  |
| 27            | 1             | 0           | 1.843566                | -0.542253 | 2.453916  |

|    |   |   |           |           |           |
|----|---|---|-----------|-----------|-----------|
| 28 | 1 | 0 | 0.419215  | 0.353407  | 2.875865  |
| 29 | 1 | 0 | 0.184716  | -1.990233 | 3.531331  |
| 30 | 1 | 0 | -1.023316 | -1.624511 | 2.297812  |
| 31 | 1 | 0 | 0.43568   | -2.545922 | 1.875939  |
| 32 | 1 | 0 | 2.583097  | 3.389126  | -0.595625 |
| 33 | 1 | 0 | 2.786782  | 2.604084  | -2.179223 |
| 34 | 1 | 0 | 1.166314  | 2.859712  | -1.487491 |

| 1-3           |               |             |                         |           |           |
|---------------|---------------|-------------|-------------------------|-----------|-----------|
| Center Number | Atomic Number | Atomic Type | Coordinates (Angstroms) |           |           |
|               |               |             | X                       | Y         | Z         |
| 1             | 7             | 0           | -3.428855               | 1.247645  | -0.343479 |
| 2             | 6             | 0           | -2.658454               | 2.059476  | 0.410969  |
| 3             | 6             | 0           | -1.353924               | 1.762636  | 0.775615  |
| 4             | 6             | 0           | -0.781898               | 0.557795  | 0.340204  |
| 5             | 6             | 0           | -1.565225               | -0.293039 | -0.449011 |
| 6             | 6             | 0           | -2.866677               | 0.085002  | -0.754286 |
| 7             | 6             | 0           | 0.640685                | 0.171739  | 0.720648  |
| 8             | 6             | 0           | 1.222411                | -0.902778 | -0.257083 |
| 9             | 7             | 0           | 0.275385                | -1.850593 | -0.766047 |
| 10            | 6             | 0           | -1.055951               | -1.587995 | -0.940753 |
| 11            | 8             | 0           | 1.446879                | 1.369407  | 0.516858  |
| 12            | 6             | 0           | 2.383502                | 1.122398  | -0.541257 |
| 13            | 6             | 0           | 1.827834                | -0.035993 | -1.350204 |
| 14            | 8             | 0           | 2.258928                | -1.67778  | 0.32485   |
| 15            | 6             | 0           | 0.748878                | -0.191225 | 2.217406  |
| 16            | 6             | 0           | -0.017597               | -1.436664 | 2.642494  |
| 17            | 6             | 0           | 2.571186                | 2.387313  | -1.357123 |
| 18            | 8             | 0           | -1.788798               | -2.40265  | -1.486289 |
| 19            | 1             | 0           | -3.13072                | 2.985569  | 0.727397  |
| 20            | 1             | 0           | -0.789037               | 2.46305   | 1.384297  |
| 21            | 1             | 0           | -3.51471                | -0.549996 | -1.353879 |
| 22            | 1             | 0           | 0.577571                | -2.766685 | -1.098145 |
| 23            | 1             | 0           | 3.336544                | 0.842932  | -0.075974 |
| 24            | 1             | 0           | 1.057415                | 0.313014  | -2.048909 |
| 25            | 1             | 0           | 2.611999                | -0.534794 | -1.929116 |
| 26            | 1             | 0           | 2.599886                | -2.26686  | -0.366217 |
| 27            | 1             | 0           | 1.806412                | -0.315381 | 2.485135  |
| 28            | 1             | 0           | 0.408533                | 0.654609  | 2.829709  |
| 29            | 1             | 0           | 0.126758                | -1.612757 | 3.71359   |
| 30            | 1             | 0           | -1.092018               | -1.326391 | 2.469364  |
| 31            | 1             | 0           | 0.32974                 | -2.328003 | 2.113188  |
| 32            | 1             | 0           | 2.950284                | 3.196112  | -0.723414 |
| 33            | 1             | 0           | 3.273683                | 2.227785  | -2.180382 |
| 34            | 1             | 0           | 1.617252                | 2.734636  | -1.769022 |

| 1-4           |               |             |                         |           |           |
|---------------|---------------|-------------|-------------------------|-----------|-----------|
| Center Number | Atomic Number | Atomic Type | Coordinates (Angstroms) |           |           |
|               |               |             | X                       | Y         | Z         |
| 1             | 7             | 0           | 3.555636                | -1.228778 | -0.111242 |
| 2             | 6             | 0           | 2.649722                | -2.180115 | 0.19675   |
| 3             | 6             | 0           | 1.303843                | -1.92092  | 0.406958  |
| 4             | 6             | 0           | 0.835202                | -0.602114 | 0.293563  |
| 5             | 6             | 0           | 1.76085                 | 0.393872  | -0.038594 |

|    |   |   |           |           |           |
|----|---|---|-----------|-----------|-----------|
| 6  | 6 | 0 | 3.091808  | 0.039517  | -0.222589 |
| 7  | 6 | 0 | -0.632243 | -0.261442 | 0.541363  |
| 8  | 6 | 0 | -1.008991 | 1.095269  | -0.147997 |
| 9  | 7 | 0 | 0.025894  | 2.082361  | -0.186514 |
| 10 | 6 | 0 | 1.363597  | 1.80439   | -0.202875 |
| 11 | 8 | 0 | -1.407051 | -1.285334 | -0.132826 |
| 12 | 6 | 0 | -2.145931 | -0.670463 | -1.201476 |
| 13 | 6 | 0 | -1.43763  | 0.632921  | -1.528904 |
| 14 | 8 | 0 | -2.100307 | 1.774976  | 0.441765  |
| 15 | 6 | 0 | -0.917634 | -0.315158 | 2.062019  |
| 16 | 6 | 0 | -2.377142 | -0.536811 | 2.448302  |
| 17 | 6 | 0 | -2.219557 | -1.624481 | -2.378447 |
| 18 | 8 | 0 | 2.190993  | 2.694173  | -0.34727  |
| 19 | 1 | 0 | 3.04442   | -3.189597 | 0.274768  |
| 20 | 1 | 0 | 0.628359  | -2.735955 | 0.652237  |
| 21 | 1 | 0 | 3.845432  | 0.781599  | -0.476278 |
| 22 | 1 | 0 | -0.226193 | 3.057886  | -0.357142 |
| 23 | 1 | 0 | -3.157717 | -0.473073 | -0.827064 |
| 24 | 1 | 0 | -0.567328 | 0.450301  | -2.171536 |
| 25 | 1 | 0 | -2.102352 | 1.334156  | -2.044166 |
| 26 | 1 | 0 | -1.746581 | 2.197029  | 1.242904  |
| 27 | 1 | 0 | -0.362341 | -1.147323 | 2.515228  |
| 28 | 1 | 0 | -0.536792 | 0.592829  | 2.546019  |
| 29 | 1 | 0 | -2.470339 | -0.55943  | 3.539282  |
| 30 | 1 | 0 | -3.034435 | 0.252859  | 2.080068  |
| 31 | 1 | 0 | -2.745731 | -1.494846 | 2.068553  |
| 32 | 1 | 0 | -2.717301 | -2.554564 | -2.083709 |
| 33 | 1 | 0 | -2.76907  | -1.181769 | -3.214256 |
| 34 | 1 | 0 | -1.217179 | -1.902499 | -2.722393 |

| 1-5           |               |             |                         |           |           |
|---------------|---------------|-------------|-------------------------|-----------|-----------|
| Center Number | Atomic Number | Atomic Type | Coordinates (Angstroms) |           |           |
|               |               |             | X                       | Y         | Z         |
| 1             | 7             | 0           | 3.381098                | -1.0127   | -0.63687  |
| 2             | 6             | 0           | 2.515446                | -2.023018 | -0.408776 |
| 3             | 6             | 0           | 1.196601                | -1.835968 | -0.022277 |
| 4             | 6             | 0           | 0.717119                | -0.529939 | 0.150469  |
| 5             | 6             | 0           | 1.597299                | 0.531461  | -0.107583 |
| 6             | 6             | 0           | 2.903665                | 0.245978  | -0.481299 |
| 7             | 6             | 0           | -0.713879               | -0.244832 | 0.596323  |
| 8             | 6             | 0           | -1.177416               | 1.13694   | 0.035244  |
| 9             | 7             | 0           | -0.183243               | 2.163058  | 0.09282   |
| 10            | 6             | 0           | 1.161489                | 1.94105   | -0.016692 |
| 11            | 8             | 0           | -1.595145               | -1.207465 | -0.032806 |
| 12            | 6             | 0           | -2.214183               | -0.602616 | -1.184771 |
| 13            | 6             | 0           | -1.592823               | 0.774457  | -1.381217 |
| 14            | 8             | 0           | -2.301724               | 1.693852  | 0.701047  |
| 15            | 6             | 0           | -0.868518               | -0.331829 | 2.133389  |
| 16            | 6             | 0           | -0.579173               | -1.697994 | 2.747929  |
| 17            | 6             | 0           | -2.04598                | -1.512886 | -2.387865 |
| 18            | 8             | 0           | 1.964928                | 2.86309   | -0.046523 |
| 19            | 1             | 0           | 2.921705                | -3.021404 | -0.547505 |
| 20            | 1             | 0           | 0.555613                | -2.697309 | 0.142138  |
| 21            | 1             | 0           | 3.620945                | 1.038086  | -0.682894 |
| 22            | 1             | 0           | -0.493528               | 3.13243   | 0.170484  |

|    |   |   |           |           |           |
|----|---|---|-----------|-----------|-----------|
| 23 | 1 | 0 | -3.281543 | -0.504385 | -0.954744 |
| 24 | 1 | 0 | -0.727283 | 0.71922   | -2.052591 |
| 25 | 1 | 0 | -2.309949 | 1.475154  | -1.822168 |
| 26 | 1 | 0 | -2.955425 | 0.984354  | 0.826979  |
| 27 | 1 | 0 | -0.231042 | 0.41638   | 2.62033   |
| 28 | 1 | 0 | -1.904303 | -0.097168 | 2.406342  |
| 29 | 1 | 0 | -0.848164 | -1.690627 | 3.809597  |
| 30 | 1 | 0 | -1.159625 | -2.488264 | 2.262657  |
| 31 | 1 | 0 | 0.48283   | -1.95061  | 2.687402  |
| 32 | 1 | 0 | -2.495543 | -2.491734 | -2.190203 |
| 33 | 1 | 0 | -2.515405 | -1.083985 | -3.278021 |
| 34 | 1 | 0 | -0.98663  | -1.693273 | -2.600432 |

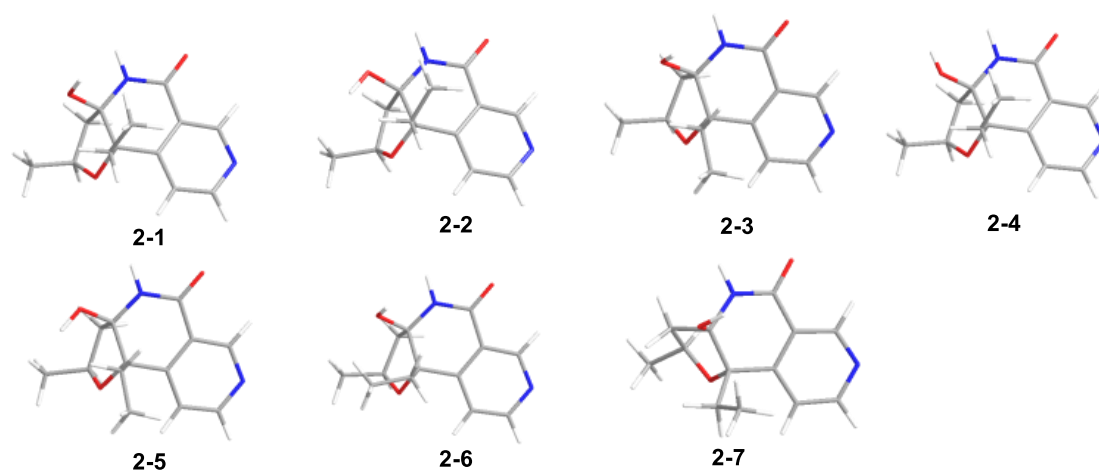

**Figure S36.** Optimized geometries of predominant conformers for **2**.

**Table S10.** Cartesian Coordinates of the Lowest Energy Conformers for Compound **2**.

| 2-1           |               |             |                         |           |           |
|---------------|---------------|-------------|-------------------------|-----------|-----------|
| Center Number | Atomic Number | Atomic Type | Coordinates (Angstroms) |           |           |
|               |               |             | X                       | Y         | Z         |
| 1             | 7             | 0           | 3.567632                | -1.047027 | -0.556647 |
| 2             | 6             | 0           | 2.783736                | -2.075289 | -0.169336 |
| 3             | 6             | 0           | 1.444765                | -1.939155 | 0.164168  |
| 4             | 6             | 0           | 0.851481                | -0.669861 | 0.09503   |
| 5             | 6             | 0           | 1.649082                | 0.407311  | -0.312899 |
| 6             | 6             | 0           | 2.983864                | 0.174447  | -0.618513 |
| 7             | 6             | 0           | -0.607062               | -0.453716 | 0.473772  |
| 8             | 6             | 0           | -1.168806               | 0.862788  | -0.152332 |
| 9             | 7             | 0           | -0.234783               | 1.942644  | -0.25854  |
| 10            | 6             | 0           | 1.11519                 | 1.780895  | -0.412225 |
| 11            | 8             | 0           | -1.356609               | -1.53739  | -0.141006 |
| 12            | 6             | 0           | -2.133625               | -1.027502 | -1.23517  |
| 13            | 6             | 0           | -1.662365               | 0.391172  | -1.509041 |
| 14            | 8             | 0           | -2.271305               | 1.4168    | 0.542137  |
| 15            | 6             | 0           | -0.813191               | -0.589288 | 1.999293  |
| 16            | 6             | 0           | -0.038163               | 0.398458  | 2.862184  |
| 17            | 6             | 0           | -3.608578               | -1.126564 | -0.869509 |
| 18            | 8             | 0           | 1.8446                  | 2.740955  | -0.620887 |
| 19            | 1             | 0           | 3.274453                | -3.044079 | -0.130817 |
| 20            | 1             | 0           | 0.871242                | -2.810368 | 0.468083  |
| 21            | 1             | 0           | 3.642414                | 0.981282  | -0.931837 |

|    |   |   |           |           |           |
|----|---|---|-----------|-----------|-----------|
| 22 | 1 | 0 | -0.584693 | 2.894214  | -0.386258 |
| 23 | 1 | 0 | -1.949325 | -1.662978 | -2.108384 |
| 24 | 1 | 0 | -0.835443 | 0.355802  | -2.229874 |
| 25 | 1 | 0 | -2.448492 | 1.020284  | -1.939922 |
| 26 | 1 | 0 | -1.899486 | 1.902016  | 1.296375  |
| 27 | 1 | 0 | -1.883065 | -0.503384 | 2.229555  |
| 28 | 1 | 0 | -0.546903 | -1.606661 | 2.31703   |
| 29 | 1 | 0 | -0.288922 | 0.243416  | 3.916843  |
| 30 | 1 | 0 | 1.041982  | 0.258364  | 2.759919  |
| 31 | 1 | 0 | -0.275067 | 1.436141  | 2.616513  |
| 32 | 1 | 0 | -3.883568 | -2.17401  | -0.70304  |
| 33 | 1 | 0 | -4.242449 | -0.724489 | -1.665293 |
| 34 | 1 | 0 | -3.834082 | -0.599956 | 0.062922  |

| 2-2           |               |             |                         |           |           |
|---------------|---------------|-------------|-------------------------|-----------|-----------|
| Center Number | Atomic Number | Atomic Type | Coordinates (Angstroms) |           |           |
|               |               |             | X                       | Y         | Z         |
| 1             | 7             | 0           | 3.469621                | -1.263703 | -0.47255  |
| 2             | 6             | 0           | 2.665033                | -2.173389 | 0.118022  |
| 3             | 6             | 0           | 1.353035                | -1.918008 | 0.48703   |
| 4             | 6             | 0           | 0.814429                | -0.649327 | 0.233481  |
| 5             | 6             | 0           | 1.634071                | 0.307577  | -0.383709 |
| 6             | 6             | 0           | 2.938896                | -0.03834  | -0.706202 |
| 7             | 6             | 0           | -0.611324               | -0.291513 | 0.629885  |
| 8             | 6             | 0           | -1.152143               | 0.877959  | -0.238675 |
| 9             | 7             | 0           | -0.191951               | 1.900814  | -0.52426  |
| 10            | 6             | 0           | 1.149438                | 1.675173  | -0.67403  |
| 11            | 8             | 0           | -1.470703               | -1.411985 | 0.293741  |
| 12            | 6             | 0           | -2.009775               | -1.22289  | -1.025114 |
| 13            | 6             | 0           | -1.627002               | 0.172211  | -1.501648 |
| 14            | 8             | 0           | -2.254815               | 1.561699  | 0.334889  |
| 15            | 6             | 0           | -0.731107               | -0.091798 | 2.157255  |
| 16            | 6             | 0           | 0.014145                | 1.107441  | 2.726865  |
| 17            | 6             | 0           | -3.512134               | -1.45248  | -0.969617 |
| 18            | 8             | 0           | 1.913044                | 2.561772  | -1.03146  |
| 19            | 1             | 0           | 3.117317                | -3.145502 | 0.29547   |
| 20            | 1             | 0           | 0.761262                | -2.695563 | 0.961296  |
| 21            | 1             | 0           | 3.614317                | 0.673662  | -1.174577 |
| 22            | 1             | 0           | -0.531466               | 2.846856  | -0.702212 |
| 23            | 1             | 0           | -1.564351               | -1.979526 | -1.681236 |
| 24            | 1             | 0           | -0.815259               | 0.079759  | -2.234514 |
| 25            | 1             | 0           | -2.452241               | 0.687891  | -2.005223 |
| 26            | 1             | 0           | -2.865306               | 0.890624  | 0.685787  |
| 27            | 1             | 0           | -1.790367               | -0.011035 | 2.433739  |
| 28            | 1             | 0           | -0.383067               | -0.996306 | 2.674339  |
| 29            | 1             | 0           | -0.130481               | 1.151637  | 3.811493  |
| 30            | 1             | 0           | 1.089948                | 1.039578  | 2.541985  |
| 31            | 1             | 0           | -0.354107               | 2.0482    | 2.309096  |
| 32            | 1             | 0           | -3.72799                | -2.461992 | -0.603335 |
| 33            | 1             | 0           | -3.967346               | -1.335923 | -1.957648 |
| 34            | 1             | 0           | -3.998134               | -0.759726 | -0.275406 |

2-3

| Center Number | Atomic Number | Atomic Type | Coordinates (Angstroms) |           |           |
|---------------|---------------|-------------|-------------------------|-----------|-----------|
|               |               |             | X                       | Y         | Z         |
| 1             | 7             | 0           | 3.561239                | -0.841713 | -0.776009 |
| 2             | 6             | 0           | 2.715291                | -1.892454 | -0.803388 |
| 3             | 6             | 0           | 1.374431                | -1.810204 | -0.458193 |
| 4             | 6             | 0           | 0.846832                | -0.576242 | -0.048979 |
| 5             | 6             | 0           | 1.706887                | 0.529876  | -0.045348 |
| 6             | 6             | 0           | 3.038065                | 0.350133  | -0.40062  |
| 7             | 6             | 0           | -0.611771               | -0.424265 | 0.37078   |
| 8             | 6             | 0           | -1.093672               | 1.046949  | 0.131049  |
| 9             | 7             | 0           | -0.120647               | 2.060481  | 0.404223  |
| 10            | 6             | 0           | 1.2303                  | 1.88627   | 0.287415  |
| 11            | 8             | 0           | -1.412064               | -1.247554 | -0.509937 |
| 12            | 6             | 0           | -2.075792               | -0.410965 | -1.473539 |
| 13            | 6             | 0           | -1.531066               | 1.003632  | -1.320808 |
| 14            | 8             | 0           | -2.210486               | 1.43272   | 0.912688  |
| 15            | 6             | 0           | -0.847945               | -0.874392 | 1.832976  |
| 16            | 6             | 0           | -0.543873               | -2.337542 | 2.138655  |
| 17            | 6             | 0           | -3.577853               | -0.51667  | -1.247473 |
| 18            | 8             | 0           | 2.004225                | 2.82032   | 0.446629  |
| 19            | 1             | 0           | 3.15511                 | -2.834582 | -1.11956  |
| 20            | 1             | 0           | 0.751265                | -2.698814 | -0.508818 |
| 21            | 1             | 0           | 3.740101                | 1.180765  | -0.40649  |
| 22            | 1             | 0           | -0.433959               | 3.018302  | 0.573238  |
| 23            | 1             | 0           | -1.846612               | -0.797561 | -2.472761 |
| 24            | 1             | 0           | -0.669547               | 1.127375  | -1.989173 |
| 25            | 1             | 0           | -2.267379               | 1.769232  | -1.587256 |
| 26            | 1             | 0           | -1.864437               | 1.604004  | 1.804609  |
| 27            | 1             | 0           | -0.270329               | -0.243416 | 2.519684  |
| 28            | 1             | 0           | -1.908181               | -0.735185 | 2.079144  |
| 29            | 1             | 0           | -0.879118               | -2.580807 | 3.152671  |
| 30            | 1             | 0           | -1.061099               | -3.00939  | 1.44728   |
| 31            | 1             | 0           | 0.529158                | -2.543518 | 2.097777  |
| 32            | 1             | 0           | -3.906142               | -1.552725 | -1.385953 |
| 33            | 1             | 0           | -4.130011               | 0.118056  | -1.94687  |
| 34            | 1             | 0           | -3.855369               | -0.241765 | -0.225228 |

| 2-4           |               |             |                         |           |           |
|---------------|---------------|-------------|-------------------------|-----------|-----------|
| Center Number | Atomic Number | Atomic Type | Coordinates (Angstroms) |           |           |
|               |               |             | X                       | Y         | Z         |
| 1             | 7             | 0           | 3.579624                | -1.045773 | -0.538377 |
| 2             | 6             | 0           | 2.802747                | -2.068465 | -0.122802 |
| 3             | 6             | 0           | 1.465246                | -1.93092  | 0.215966  |
| 4             | 6             | 0           | 0.865159                | -0.666352 | 0.122087  |
| 5             | 6             | 0           | 1.655892                | 0.404597  | -0.312215 |
| 6             | 6             | 0           | 2.990394                | 0.171842  | -0.619342 |
| 7             | 6             | 0           | -0.595524               | -0.449963 | 0.495051  |
| 8             | 6             | 0           | -1.16584                | 0.84828   | -0.15954  |
| 9             | 7             | 0           | -0.234467               | 1.932812  | -0.280799 |
| 10            | 6             | 0           | 1.116938                | 1.773892  | -0.424183 |
| 11            | 8             | 0           | -1.332189               | -1.554242 | -0.102209 |
| 12            | 6             | 0           | -2.099971               | -1.07711  | -1.215395 |
| 13            | 6             | 0           | -1.644294               | 0.342788  | -1.511956 |
| 14            | 8             | 0           | -2.272137               | 1.3878    | 0.54379   |
| 15            | 6             | 0           | -0.807742               | -0.550522 | 2.021517  |

|    |   |   |           |           |           |
|----|---|---|-----------|-----------|-----------|
| 16 | 6 | 0 | -0.129532 | 0.533576  | 2.848512  |
| 17 | 6 | 0 | -3.578306 | -1.186436 | -0.866892 |
| 18 | 8 | 0 | 1.842773  | 2.735946  | -0.637843 |
| 19 | 1 | 0 | 3.298066  | -3.03407  | -0.065381 |
| 20 | 1 | 0 | 0.897348  | -2.797495 | 0.54283   |
| 21 | 1 | 0 | 3.644096  | 0.976105  | -0.948604 |
| 22 | 1 | 0 | -0.561333 | 2.897591  | -0.336206 |
| 23 | 1 | 0 | -1.896688 | -1.727158 | -2.073521 |
| 24 | 1 | 0 | -0.811245 | 0.304125  | -2.225558 |
| 25 | 1 | 0 | -2.434438 | 0.952218  | -1.962897 |
| 26 | 1 | 0 | -2.615166 | 2.127712  | 0.018748  |
| 27 | 1 | 0 | -1.883893 | -0.542137 | 2.238986  |
| 28 | 1 | 0 | -0.463343 | -1.529935 | 2.379889  |
| 29 | 1 | 0 | -0.343936 | 0.37722   | 3.910913  |
| 30 | 1 | 0 | 0.957327  | 0.512467  | 2.726149  |
| 31 | 1 | 0 | -0.489607 | 1.53148   | 2.58428   |
| 32 | 1 | 0 | -3.842687 | -2.232935 | -0.679072 |
| 33 | 1 | 0 | -4.206388 | -0.811397 | -1.68038  |
| 34 | 1 | 0 | -3.82278  | -0.640335 | 0.049302  |

| 2-5           |               |             |                         |           |           |
|---------------|---------------|-------------|-------------------------|-----------|-----------|
| Center Number | Atomic Number | Atomic Type | Coordinates (Angstroms) |           |           |
|               |               |             | X                       | Y         | Z         |
| 1             | 7             | 0           | 3.460556                | -0.922216 | -0.898268 |
| 2             | 6             | 0           | 2.595395                | -1.956813 | -0.835918 |
| 3             | 6             | 0           | 1.28062                 | -1.838126 | -0.410305 |
| 4             | 6             | 0           | 0.807239                | -0.580065 | -0.014314 |
| 5             | 6             | 0           | 1.686856                | 0.510257  | -0.095502 |
| 6             | 6             | 0           | 2.988444                | 0.292256  | -0.525336 |
| 7             | 6             | 0           | -0.617073               | -0.370635 | 0.489751  |
| 8             | 6             | 0           | -1.084678               | 1.078665  | 0.160807  |
| 9             | 7             | 0           | -0.092142               | 2.082311  | 0.395073  |
| 10            | 6             | 0           | 1.252645                | 1.883347  | 0.241602  |
| 11            | 8             | 0           | -1.526846               | -1.20291  | -0.265098 |
| 12            | 6             | 0           | -1.950432               | -0.482953 | -1.439449 |
| 13            | 6             | 0           | -1.498843               | 0.969241  | -1.299672 |
| 14            | 8             | 0           | -2.211846               | 1.509549  | 0.908576  |
| 15            | 6             | 0           | -0.748692               | -0.701772 | 1.995417  |
| 16            | 6             | 0           | -0.461996               | -2.151359 | 2.37541   |
| 17            | 6             | 0           | -3.456005               | -0.638353 | -1.584163 |
| 18            | 8             | 0           | 2.057102                | 2.796262  | 0.367429  |
| 19            | 1             | 0           | 2.999003                | -2.917277 | -1.145311 |
| 20            | 1             | 0           | 0.63966                 | -2.714622 | -0.385388 |
| 21            | 1             | 0           | 3.705844                | 1.106463  | -0.59549  |
| 22            | 1             | 0           | -0.404026               | 3.022538  | 0.641488  |
| 23            | 1             | 0           | -1.465344               | -0.943985 | -2.307755 |
| 24            | 1             | 0           | -0.648091               | 1.140668  | -1.971235 |
| 25            | 1             | 0           | -2.279402               | 1.68274   | -1.586095 |
| 26            | 1             | 0           | -2.855288               | 0.779584  | 0.910917  |
| 27            | 1             | 0           | -0.096729               | -0.046409 | 2.585901  |
| 28            | 1             | 0           | -1.777793               | -0.507408 | 2.320755  |
| 29            | 1             | 0           | -0.713183               | -2.314499 | 3.428951  |
| 30            | 1             | 0           | -1.057814               | -2.84867  | 1.778898  |
| 31            | 1             | 0           | 0.596426                | -2.397975 | 2.255249  |
| 32            | 1             | 0           | -3.72227                | -1.69819  | -1.659753 |

|    |   |   |           |           |           |
|----|---|---|-----------|-----------|-----------|
| 33 | 1 | 0 | -3.823213 | -0.122439 | -2.476343 |
| 34 | 1 | 0 | -3.984842 | -0.246524 | -0.709651 |

| 2-6           |               |             |                         |           |           |
|---------------|---------------|-------------|-------------------------|-----------|-----------|
| Center Number | Atomic Number | Atomic Type | Coordinates (Angstroms) |           |           |
|               |               |             | X                       | Y         | Z         |
| 1             | 7             | 0           | 3.667456                | -1.138932 | -0.360919 |
| 2             | 6             | 0           | 2.780434                | -2.153333 | -0.285493 |
| 3             | 6             | 0           | 1.423927                | -1.973812 | -0.061437 |
| 4             | 6             | 0           | 0.923919                | -0.671291 | 0.093902  |
| 5             | 6             | 0           | 1.830063                | 0.392345  | 0.00686   |
| 6             | 6             | 0           | 3.173432                | 0.114114  | -0.212065 |
| 7             | 6             | 0           | -0.556986               | -0.418242 | 0.373624  |
| 8             | 6             | 0           | -0.953809               | 1.033217  | -0.050012 |
| 9             | 7             | 0           | 0.050333                | 2.032193  | 0.163418  |
| 10            | 6             | 0           | 1.396414                | 1.79619   | 0.135956  |
| 11            | 8             | 0           | -1.302292               | -1.308429 | -0.489968 |
| 12            | 6             | 0           | -1.874847               | -0.555125 | -1.572252 |
| 13            | 6             | 0           | -1.299439               | 0.852907  | -1.517565 |
| 14            | 8             | 0           | -2.088361               | 1.55727   | 0.609354  |
| 15            | 6             | 0           | -0.850312               | -0.768611 | 1.853174  |
| 16            | 6             | 0           | -2.307514               | -1.075988 | 2.183967  |
| 17            | 6             | 0           | -3.391704               | -0.598797 | -1.447408 |
| 18            | 8             | 0           | 2.20095                 | 2.714518  | 0.214644  |
| 19            | 1             | 0           | 3.200392                | -3.147655 | -0.411556 |
| 20            | 1             | 0           | 0.765287                | -2.836551 | -0.009764 |
| 21            | 1             | 0           | 3.912479                | 0.909032  | -0.281366 |
| 22            | 1             | 0           | -0.227939               | 3.014809  | 0.196216  |
| 23            | 1             | 0           | -1.590439               | -1.043664 | -2.510818 |
| 24            | 1             | 0           | -0.393236               | 0.887786  | -2.135812 |
| 25            | 1             | 0           | -1.991863               | 1.606551  | -1.907467 |
| 26            | 1             | 0           | -1.786707               | 1.805304  | 1.49935   |
| 27            | 1             | 0           | -0.288093               | -1.668104 | 2.138086  |
| 28            | 1             | 0           | -0.481328               | 0.031247  | 2.50726   |
| 29            | 1             | 0           | -2.396885               | -1.338016 | 3.243672  |
| 30            | 1             | 0           | -2.967493               | -0.225883 | 2.003058  |
| 31            | 1             | 0           | -2.675459               | -1.9282   | 1.604246  |
| 32            | 1             | 0           | -3.742579               | -1.635965 | -1.47994  |
| 33            | 1             | 0           | -3.871241               | -0.044091 | -2.259513 |
| 34            | 1             | 0           | -3.733261               | -0.187748 | -0.49288  |

| 2-7           |               |             |                         |           |           |
|---------------|---------------|-------------|-------------------------|-----------|-----------|
| Center Number | Atomic Number | Atomic Type | Coordinates (Angstroms) |           |           |
|               |               |             | X                       | Y         | Z         |
| 1             | 7             | 0           | 3.662487                | -0.353637 | -0.802219 |
| 2             | 6             | 0           | 3.00599                 | -1.527431 | -0.881192 |
| 3             | 6             | 0           | 1.658696                | -1.675796 | -0.584463 |
| 4             | 6             | 0           | 0.914476                | -0.560303 | -0.16175  |
| 5             | 6             | 0           | 1.575116                | 0.67062   | -0.116449 |
| 6             | 6             | 0           | 2.928787                | 0.72382   | -0.435462 |
| 7             | 6             | 0           | -0.563675               | -0.672715 | 0.162303  |
| 8             | 6             | 0           | -1.207417               | 0.652753  | 0.718023  |
| 9             | 7             | 0           | -0.436152               | 1.853822  | 0.553157  |
| 10            | 6             | 0           | 0.87984                 | 1.926095  | 0.207716  |



|    |   |   |           |           |           |
|----|---|---|-----------|-----------|-----------|
| 11 | 8 | 0 | -1.198686 | -0.905988 | -1.133563 |
| 12 | 6 | 0 | -2.086301 | 0.182894  | -1.418073 |
| 13 | 6 | 0 | -2.50151  | 0.735306  | -0.073061 |
| 14 | 8 | 0 | -1.51299  | 0.649402  | 2.094152  |
| 15 | 6 | 0 | -0.917857 | -1.917301 | 1.02347   |
| 16 | 6 | 0 | -0.141821 | -2.08121  | 2.32619   |
| 17 | 6 | 0 | -3.252527 | -0.316763 | -2.248757 |
| 18 | 8 | 0 | 1.45459   | 3.006765  | 0.177376  |
| 19 | 1 | 0 | 3.604806  | -2.374255 | -1.205268 |
| 20 | 1 | 0 | 1.198565  | -2.652592 | -0.698482 |
| 21 | 1 | 0 | 3.478655  | 1.662176  | -0.414248 |
| 22 | 1 | 0 | -0.875397 | 2.751133  | 0.771251  |
| 23 | 1 | 0 | -1.523534 | 0.931277  | -1.98911  |
| 24 | 1 | 0 | -2.918096 | 1.745829  | -0.144722 |
| 25 | 1 | 0 | -3.267513 | 0.102069  | 0.393106  |
| 26 | 1 | 0 | -0.725154 | 1.01508   | 2.531656  |
| 27 | 1 | 0 | -1.992152 | -1.902722 | 1.250527  |
| 28 | 1 | 0 | -0.785138 | -2.830969 | 0.428662  |
| 29 | 1 | 0 | -0.506152 | -2.965053 | 2.860897  |
| 30 | 1 | 0 | 0.926388  | -2.230373 | 2.14561   |
| 31 | 1 | 0 | -0.255558 | -1.226155 | 2.994783  |
| 32 | 1 | 0 | -2.893649 | -0.73534  | -3.195056 |
| 33 | 1 | 0 | -3.958175 | 0.490108  | -2.467311 |
| 34 | 1 | 0 | -3.78635  | -1.122766 | -1.733557 |
